# Supplementary material
Source: PubMed Central journal article supplement (PMC4047465)
Supplement: supp_M113.034322_mcp.M113.034322-9.pdf [file supp_M113.034322_mcp.M113.034322-9.pdf]

1. P67870 Score: 81 Expect: 0.00017 Casein kinase II subunit beta OS=Homo sapiens GN=CSNK2B PE=1 SV=1

Nominal mass ( $M_r$ ): 25268; Calculated pI value: 5.33

Fixed modifications: Carbamidomethyl (C)

Variable modifications: Oxidation (M)

Cleavage by Trypsin: cuts C-term side of KR unless next residue is P

Number of mass values searched: 69

Number of mass values matched: 7

Sequence Coverage: 16%

---

| Observed  | Mr(expt)  | Mr(calc)  | Delta  | Start | End   | Miss | Ions | Peptide                      |
|-----------|-----------|-----------|--------|-------|-------|------|------|------------------------------|
| 889.4958  | 888.4885  | 888.4738  | 0.0147 | 93    | - 100 | 0    | ---  | R.GIAQMLEK.Y                 |
| 905.4865  | 904.4792  | 904.4688  | 0.0105 | 93    | - 100 | 0    | ---  | R.GIAQMLEK.Y + Oxidation (M) |
| 1013.4557 | 1012.4484 | 1012.4358 | 0.0126 | 140   | - 147 | 0    | ---  | K.CMDVYTPK.S                 |
| 1029.4467 | 1028.4394 | 1028.4307 | 0.0087 | 140   | - 147 | 0    | ---  | K.CMDVYTPK.S + Oxidation (M) |
| 1084.6104 | 1083.6031 | 1083.5937 | 0.0094 | 178   | - 186 | 0    | ---  | K.RPANQFVPR.L                |
| 1390.5920 | 1389.5847 | 1389.5771 | 0.0076 | 101   | - 111 | 0    | 58   | K.YQQGDFGYCPR.V              |
| 1390.5962 | 1389.5889 | 1389.5771 | 0.0118 | 101   | - 111 | 0    | ---  | K.YQQGDFGYCPR.V              |

---

2. P78371 Score: 119 Expect: 2.8e-07 Chaperonin containing TCP1, subunit 2 (beta), isoform CRA\_c [Homo sapiens]

Nominal mass (Mr): 53027; Calculated pI value: 6.00

Fixed modifications: Carbamidomethyl (C)

Variable modifications: Oxidation (M)

Cleavage by Trypsin: cuts C-term side of KR unless next residue is P

Number of mass values searched: 20

Number of mass values matched: 11

Sequence Coverage: 30%

---

| Observed  | Mr(expt)  | Mr(calc)  | ppm    | Start | End   | Miss | Peptide                             |
|-----------|-----------|-----------|--------|-------|-------|------|-------------------------------------|
| 1130.5544 | 1129.5471 | 1129.5451 | 1.81   | 238   | - 246 | 0    | K.HGINCFINR.Q                       |
| 1251.6726 | 1250.6653 | 1250.6983 | -26.33 | 145   | - 156 | 0    | K.GSGNLEAIHIK.K                     |
| 1291.6986 | 1290.6913 | 1290.7197 | -21.96 | 74    | - 84  | 0    | K.IHPQTIIAGWR.E                     |
| 1330.6541 | 1329.6468 | 1329.6524 | -4.21  | 330   | - 341 | 0    | R.GATQQILDEAER.S                    |
| 1530.6963 | 1529.6890 | 1529.6892 | -0.16  | 420   | - 434 | 0    | R.AAHSEGNTTAGLDMR.E                 |
| 1546.6851 | 1545.6778 | 1545.6842 | -4.11  | 420   | - 434 | 0    | R.AAHSEGNTTAGLDMR.E + Oxidation (M) |
| 1548.7639 | 1547.7566 | 1547.7865 | -19.33 | 11    | - 25  | 0    | R.DASLMVTNDGATILK.N                 |
| 1656.7777 | 1655.7705 | 1655.8002 | -17.98 | 92    | - 107 | 0    | R.EALLSSAVDHGSDEVK.F                |
| 2041.0169 | 2040.0096 | 2040.0415 | -15.63 | 158   | - 176 | 1    | K.LGGSLADSYLDEGFLLDKK.I             |
| 2097.1093 | 2096.1020 | 2096.1154 | -6.36  | 276   | - 295 | 0    | R.LALVTGGEIASTFDHPELVK.L            |
| 2288.1597 | 2287.1524 | 2287.1544 | -0.86  | 43    | - 64  | 0    | R.VQDDEVDGTTSVTVLAAELLR.E           |

---

3. P31146 Score: 118 Expect: 3.6e-07 coronin-like protein

Nominal mass (Mr): 51722; Calculated pI value: 6.12

Fixed modifications: Carbamidomethyl (C)

Variable modifications: Oxidation (M)

Cleavage by Trypsin: cuts C-term side of KR unless next residue is P

Number of mass values searched: 10

Number of mass values matched: 8

Sequence Coverage: 19%

---

| Observed  | Mr (expt) | Mr (calc) | ppm    | Start | End   | Miss | Peptide              |
|-----------|-----------|-----------|--------|-------|-------|------|----------------------|
| 883.4526  | 882.4453  | 882.4712  | -29.31 | 13    | - 20  | 0    | R.HVFGQPAK.A         |
| 894.5072  | 893.5000  | 893.4971  | 3.24   | 234   | - 241 | 0    | K.ILTTGFSR.M         |
| 1026.5682 | 1025.5609 | 1025.6121 | -49.87 | 384   | - 393 | 0    | R.DAGPLLISLK.D       |
| 1138.4818 | 1137.4746 | 1137.4907 | -14.18 | 187   | - 196 | 0    | R.DGGLICTSCR.D       |
| 1155.4611 | 1154.4538 | 1154.4662 | -10.77 | 21    | - 29  | 0    | K.ADQCYEDVR.V        |
| 1319.6659 | 1318.6586 | 1318.6854 | -20.33 | 215   | - 225 | 0    | K.DRPHEGTRPVR.A      |
| 1502.6999 | 1501.6926 | 1501.7009 | -5.50  | 417   | - 432 | 0    | R.AAPEASGTPSSDAVSR.L |
| 1796.7666 | 1795.7593 | 1795.8200 | -33.79 | 30    | - 45  | 0    | R.VSQTTWDSGFCVNP.K.F |

---

4. P05198 Score: 109 Expect: 2.6e-007 Eukaryotic translation initiation factor 2 subunit 1 OS=Homo sapiens GN=EIF2S1 PE=1 SV=3

Nominal mass ( $M_r$ ): 36374; Calculated pI value: 5.02

Fixed modifications: Carbamidomethyl (C)

Variable modifications: Oxidation (M)

Cleavage by Trypsin: cuts C-term side of KR unless next residue is P

Number of mass values searched: 41

Number of mass values matched: 13

Sequence Coverage: 40%

| Observed  | Mr (expt) | Mr (calc) | Delta   | Start | End   | Miss | Peptide                           |
|-----------|-----------|-----------|---------|-------|-------|------|-----------------------------------|
| 851.4998  | 850.4925  | 850.4912  | 0.0013  | 107   | - 113 | 0    | K.TVYSILR.H                       |
| 893.5442  | 892.5369  | 892.5494  | -0.0125 | 227   | - 234 | 0    | K.INLIAPPR.Y                      |
| 1214.6241 | 1213.6168 | 1213.6013 | 0.0156  | 235   | - 244 | 0    | R.YVMTTTTLER.T                    |
| 1230.6190 | 1229.6117 | 1229.5962 | 0.0155  | 235   | - 244 | 0    | R.YVMTTTTLER.T + Oxidation (M)    |
| 1240.7024 | 1239.6951 | 1239.7047 | -0.0096 | 174   | - 183 | 1    | R.EVLINNINRR.L                    |
| 1244.6217 | 1243.6144 | 1243.5985 | 0.0159  | 144   | - 154 | 0    | K.RPGYGAYDAFK.H                   |
| 1264.6146 | 1263.6073 | 1263.6095 | -0.0022 | 124   | - 133 | 0    | K.DEQLESLEFQR.T                   |
| 1272.6345 | 1271.6272 | 1271.6186 | 0.0086  | 134   | - 143 | 1    | R.TAWVFDDKYK.R                    |
| 1314.7419 | 1313.7346 | 1313.7237 | 0.0109  | 65    | - 75  | 1    | R.IGRNECVVIR.V                    |
| 1320.6627 | 1319.6554 | 1319.6655 | -0.0101 | 266   | - 276 | 1    | K.RGVFNVQMEPK.V + Oxidation (M)   |
| 1392.6992 | 1391.6919 | 1391.6768 | 0.0151  | 2     | - 12  | 1    | M.PGLSCRFYQHK.F                   |
| 1450.6831 | 1449.6758 | 1449.6592 | 0.0167  | 214   | - 226 | 0    | R.AGLNCSTENMPIK.I + Oxidation (M) |
| 1872.8926 | 1871.8853 | 1871.8611 | 0.0243  | 193   | - 209 | 0    | R.ADIEVACYGYEGIDAVK.E             |

5. P00883 Score: 190 Expect: 2.3e-14 Chain A, Human Muscle Fructose 1,6-Bisphosphate Aldolase Complexed With Fructose 1,6-Bisphosphate

Nominal mass (Mr): 39720; Calculated pI value: 8.39

Fixed modifications: Carbamidomethyl (C)

Variable modifications: Oxidation (M)

Cleavage by Trypsin: cuts C-term side of KR unless next residue is P

Number of mass values searched: 27

Number of mass values matched: 14

Sequence Coverage: 46%

| Observed  | Mr (expt) | Mr (calc) | ppm | Start | End | Miss | Peptide                                |
|-----------|-----------|-----------|-----|-------|-----|------|----------------------------------------|
| 1434.6873 | 1433.6800 | 1433.7191 | -27 | 1     | 12  | 0    | -.PYQYPALTPEQK.K                       |
| 940.4631  | 939.4558  | 939.4774  | -23 | 14    | 21  | 0    | K.ELSDIAHR.I                           |
| 1332.6630 | 1331.6557 | 1331.6932 | -28 | 28    | 41  | 0    | K.GILAADESTGSIK.R                      |
| 1646.7950 | 1645.7877 | 1645.8019 | -9  | 43    | 56  | 1    | R.LQSIGTENTEENRR.F                     |
| 1044.5622 | 1043.5549 | 1043.5611 | -6  | 60    | 68  | 0    | R.QLLLTADDR.                           |
| 2088.0665 | 2087.0592 | 2087.0874 | -13 | 69    | 86  | 0    | R.VNPCIGGVILFHETLYQK.A                 |
| 1342.7024 | 1341.6951 | 1341.7041 | -7  | 87    | 98  | 0    | K.ADDGRPFQVIK.S                        |
| 2272.1360 | 2271.1287 | 2271.1343 | -2  | 111   | 133 | 0    | K.GVVPLAGTNGETTTQGLDGLSER.C            |
| 2123.0775 | 2122.0703 | 2122.0840 | -6  | 153   | 172 | 0    | K.IGEHTPSALAIMENANVLAR.Y Oxidation (M) |
| 1675.8306 | 1674.8233 | 1674.8399 | -10 | 243   | 257 | 0    | K.FSHEEIAMATVTALR.R                    |
| 1691.8138 | 1690.8065 | 1690.8348 | -17 | 243   | 257 | 0    | K.FSHEEIAMATVTALR.R Oxidation (M)      |
| 1847.9185 | 1846.9113 | 1846.9359 | -13 | 243   | 258 | 1    | K.FSHEEIAMATVTALRR.T Oxidation (M)     |
| 1808.9189 | 1807.9117 | 1807.9443 | -18 | 289   | 303 | 0    | K.CPLLKPWALTFSYGR.A                    |
| 1093.5652 | 1092.5579 | 1092.5563 | 1   | 322   | 330 | 1    | K.AAQEEYVKR.A                          |

6. P62081 Score: 107 Expect: 4.1e-007 40S ribosomal protein S7 OS=Homo sapiens GN=RPS7 PE=1 SV=1

Nominal mass ( $M_r$ ): 22113; Calculated pI value: 10.09

Fixed modifications: Carbamidomethyl (C)

Variable modifications: Oxidation (M)

Cleavage by Trypsin: cuts C-term side of KR unless next residue is P

Number of mass values searched: 12

Number of mass values matched: 4

Sequence Coverage: 12%

---

| Observed  | Mr(expt)  | Mr(calc)  | Delta   | Start | End  | Miss | Ions | Peptide              |
|-----------|-----------|-----------|---------|-------|------|------|------|----------------------|
| 944.5199  | 943.5126  | 943.5086  | 0.0040  | 50    | - 58 | 1    | 8    | K.EIEVGGGRK.A        |
| 969.5694  | 968.5621  | 968.5555  | 0.0066  | 91    | - 98 | 0    | ---  | K.HVVFIAQR.R         |
| 969.5717  | 968.5644  | 968.5555  | 0.0089  | 91    | - 98 | 0    | 35   | K.HVVFIAQR.R         |
| 1656.8793 | 1655.8720 | 1655.8842 | -0.0121 | 42    | - 57 | 1    | 29   | R.ELNITAAKEIEVGGGR.K |

---

7. P07437 Score: 74 Expect: 0.00091 Tubulin beta chain OS=Homo sapiens GN=TUBB PE=1 SV=2

Nominal mass ( $M_r$ ): 50095; Calculated pI value: 4.78

Fixed modifications: Carbamidomethyl (C)

Variable modifications: Oxidation (M)

Cleavage by Trypsin: cuts C-term side of KR unless next residue is P

Number of mass values searched: 65

Number of mass values matched: 13

Sequence Coverage: 26%

| Observed  | Mr (expt) | Mr (calc) | Delta   | Start | End   | Miss | Peptide                             |
|-----------|-----------|-----------|---------|-------|-------|------|-------------------------------------|
| 1028.5284 | 1027.5211 | 1027.5121 | 0.0091  | 351   | - 359 | 0    | K.TAVCDIPPR.G                       |
| 1077.5402 | 1076.5329 | 1076.5250 | 0.0079  | 155   | - 162 | 1    | K.IREEYPDR.I                        |
| 1130.5961 | 1129.5888 | 1129.5880 | 0.0009  | 242   | - 251 | 0    | R.FPGQLNADLR.K                      |
| 1159.6273 | 1158.6200 | 1158.6219 | -0.0019 | 253   | - 262 | 0    | K.LAVNMVPPFR.L + Oxidation (M)      |
| 1229.5757 | 1228.5684 | 1228.5910 | -0.0226 | 381   | - 390 | 0    | R.ISEQFTAMFR.R                      |
| 1245.6050 | 1244.5977 | 1244.5859 | 0.0118  | 381   | - 390 | 0    | R.ISEQFTAMFR.R + Oxidation (M)      |
| 1301.6370 | 1300.6297 | 1300.6299 | -0.0001 | 47    | - 58  | 0    | R.ISVYYNEATGGK.Y                    |
| 1326.7136 | 1325.7063 | 1325.7125 | -0.0062 | 351   | - 362 | 1    | K.TAVCDIPPRGLK.M                    |
| 1335.6945 | 1334.6872 | 1334.6904 | -0.0032 | 163   | - 174 | 0    | R.IMNTFSVVPSPK.V + Oxidation (M)    |
| 1615.8684 | 1614.8611 | 1614.8287 | 0.0325  | 63    | - 77  | 0    | R.AILVDLEPGTMDSVR.S                 |
| 1631.8376 | 1630.8303 | 1630.8236 | 0.0067  | 63    | - 77  | 0    | R.AILVDLEPGTMDSVR.S + Oxidation (M) |
| 1659.8854 | 1658.8781 | 1658.8879 | -0.0098 | 283   | - 297 | 0    | R.ALTVPILTQQVFDK.N                  |
| 1696.8754 | 1695.8681 | 1695.8256 | 0.0425  | 337   | - 350 | 0    | K.NSSYFVEWIPNNVK.T                  |

8. P14625 Score: 127 Expect: 4.1e-009 Tumor rejection antigen 1 OS=Homo sapiens GN=HSP90B1 PE=1 SV=1

Nominal mass ( $M_r$ ): 92696; Calculated pI value: 4.76

Fixed modifications: Carbamidomethyl (C)

Variable modifications: Oxidation (M)

Cleavage by Trypsin: cuts C-term side of KR unless next residue is P

Number of mass values searched: 42

Number of mass values matched: 19

Sequence Coverage: 19%

---

| Observed  | Mr (expt) | Mr (calc) | Delta   | Start | End   | Miss | Peptide                             |
|-----------|-----------|-----------|---------|-------|-------|------|-------------------------------------|
| 876.4645  | 875.4572  | 875.4501  | 0.0071  | 684   | - 690 | 0    | K.TFEINPR.H                         |
| 919.5422  | 918.5349  | 918.5287  | 0.0063  | 96    | - 102 | 1    | K.NKEIFLR.E                         |
| 979.5009  | 978.4936  | 978.4883  | 0.0054  | 734   | - 741 | 1    | K.AYGDRIER.M                        |
| 1004.5504 | 1003.5431 | 1003.5450 | -0.0019 | 683   | - 690 | 1    | K.KTFEINPR.H                        |
| 1015.4598 | 1014.4525 | 1014.4658 | -0.0133 | 396   | - 404 | 0    | R.GLFDEYGSK.K                       |
| 1081.5607 | 1080.5534 | 1080.5352 | 0.0182  | 76    | - 84  | 0    | K.FAFQAEVNR.M                       |
| 1139.5865 | 1138.5792 | 1138.5730 | 0.0062  | 494   | - 503 | 0    | K.LGVIEDHSNR.T                      |
| 1150.5499 | 1149.5426 | 1149.5302 | 0.0125  | 548   | - 557 | 0    | K.EAESSPFVER.L                      |
| 1187.6870 | 1186.6797 | 1186.6710 | 0.0087  | 385   | - 395 | 0    | K.SILFVPTSAPR.G                     |
| 1278.6436 | 1277.6363 | 1277.6251 | 0.0112  | 547   | - 557 | 1    | R.KEAESSPFVER.L                     |
| 1396.7245 | 1395.7172 | 1395.7218 | -0.0046 | 494   | - 505 | 1    | K.LGVIEDHSNRTR.L                    |
| 1417.7162 | 1416.7089 | 1416.6885 | 0.0204  | 672   | - 683 | 1    | K.DISTNYASQKK.T                     |
| 1418.6913 | 1417.6840 | 1417.6660 | 0.0181  | 535   | - 546 | 1    | K.QDKIYFMAGSSR.K + Oxidation (M)    |
| 1425.7090 | 1424.7017 | 1424.7048 | -0.0030 | 73    | - 84  | 1    | K.SEKFAFQAEVNR.M                    |
| 1485.7811 | 1484.7738 | 1484.7470 | 0.0268  | 435   | - 448 | 0    | K.GVVSDDDLPLNVS.R.E                 |
| 1529.7734 | 1528.7661 | 1528.7667 | -0.0006 | 143   | - 156 | 0    | K.NLLHVTDGTGVMTR.E + Oxidation (M)  |
| 1544.8385 | 1543.8312 | 1543.8205 | 0.0107  | 103   | - 116 | 1    | R.ELISNASDALDKIR.L                  |
| 1627.7271 | 1626.7198 | 1626.7058 | 0.0140  | 416   | - 428 | 0    | R.VFITDDFHDMPK.Y + 2 Oxidation (M)  |
| 1783.8442 | 1782.8369 | 1782.8069 | 0.0300  | 415   | - 428 | 1    | R.RVFITDDFHDMPK.Y + 2 Oxidation (M) |

---



9. P62258 Score: 111 Expect: 1.6e-007 14-3-3 protein epsilon OS=Homo sapiens GN=YWHAE PE=1 SV=1

Nominal mass ( $M_r$ ): 29326; Calculated pI value: 4.63

Fixed modifications: Carbamidomethyl (C)

Variable modifications: Oxidation (M)

Cleavage by Trypsin: cuts C-term side of KR unless next residue is P

Number of mass values searched: 43

Number of mass values matched: 15

Sequence Coverage: 44%

---

| Observed  | Mr (expt) | Mr (calc) | Delta   | Start | End   | Miss | Peptide                               |
|-----------|-----------|-----------|---------|-------|-------|------|---------------------------------------|
| 917.5410  | 916.5337  | 916.5229  | 0.0108  | 62    | - 69  | 0    | R.IISSIEQK.E                          |
| 922.4335  | 921.4262  | 921.4127  | 0.0136  | 124   | - 130 | 1    | K.MKGDYHR.Y + Oxidation (M)           |
| 1194.5953 | 1193.5880 | 1193.5928 | -0.0047 | 143   | - 153 | 0    | K.EAAENSLVAYK.A                       |
| 1237.6423 | 1236.6350 | 1236.6462 | -0.0112 | 107   | - 118 | 0    | K.HLIPAANTGESK.V                      |
| 1256.5961 | 1255.5888 | 1255.5833 | 0.0056  | 131   | - 141 | 0    | R.YLAEFATGNDR.K                       |
| 1291.5752 | 1290.5679 | 1290.5472 | 0.0208  | 20    | - 29  | 1    | R.YDEMVESMKK.V + 2 Oxidation (M)      |
| 1384.6934 | 1383.6861 | 1383.6782 | 0.0079  | 131   | - 142 | 1    | R.YLAEFATGNDRK.E                      |
| 1441.7052 | 1440.6979 | 1440.6918 | 0.0061  | 84    | - 94  | 1    | R.EYRQMVETELK.L + Oxidation (M)       |
| 1447.7321 | 1446.7248 | 1446.7024 | 0.0224  | 30    | - 42  | 0    | K.VAGMDVELTVEER.N                     |
| 1463.7198 | 1462.7125 | 1462.6973 | 0.0152  | 30    | - 42  | 0    | K.VAGMDVELTVEER.N + Oxidation (M)     |
| 1476.7738 | 1475.7665 | 1475.7364 | 0.0302  | 95    | - 106 | 0    | K.LICCDILDVLDK.H                      |
| 1575.8325 | 1574.8252 | 1574.7973 | 0.0279  | 29    | - 42  | 1    | K.KVAGMDVELTVEER.N                    |
| 1591.8267 | 1590.8194 | 1590.7923 | 0.0272  | 29    | - 42  | 1    | K.KVAGMDVELTVEER.N + Oxidation (M)    |
| 1819.9930 | 1818.9857 | 1818.9298 | 0.0559  | 154   | - 170 | 0    | K.AASDIAMTELPPTHPIR.L                 |
| 1835.9967 | 1834.9894 | 1834.9247 | 0.0647  | 154   | - 170 | 0    | K.AASDIAMTELPPTHPIR.L + Oxidation (M) |

---

10. P07910 Score: 146 Expect: 5.1e-011 Heterogeneous nuclear ribonucleoproteins C1/C2 OS=Homo sapiens GN=HNRNPC PE=1 SV=4

Nominal mass ( $M_r$ ): 33707; Calculated pI value: 4.95

Fixed modifications: Carbamidomethyl (C)

Variable modifications: Oxidation (M)

Cleavage by Trypsin: cuts C-term side of KR unless next residue is P

Number of mass values searched: 13

Number of mass values matched: 8

Sequence Coverage: 10%

---

| Observed  | Mr (expt) | Mr (calc) | Delta   | Start | End   | Miss | Ions | Peptide          |
|-----------|-----------|-----------|---------|-------|-------|------|------|------------------|
| 943.5801  | 942.5728  | 942.5651  | 0.0078  | 143   | - 151 | 0    | 49   | R.VPPPPPIAR.A    |
| 943.5998  | 942.5925  | 942.5651  | 0.0275  | 143   | - 151 | 0    | (49) | R.VPPPPPIAR.A    |
| 943.6174  | 942.6101  | 942.5651  | 0.0451  | 143   | - 151 | 0    | ---  | R.VPPPPPIAR.A    |
| 1329.6591 | 1328.6518 | 1328.6513 | 0.0006  | 51    | - 61  | 0    | 34   | K.GFAFVQYVNER.N  |
| 1329.6652 | 1328.6579 | 1328.6513 | 0.0067  | 51    | - 61  | 0    | (32) | K.GFAFVQYVNER.N  |
| 1329.7025 | 1328.6952 | 1328.6513 | 0.0440  | 51    | - 61  | 0    | ---  | K.GFAFVQYVNER.N  |
| 1343.6757 | 1342.6684 | 1342.6768 | -0.0084 | 31    | - 42  | 1    | 31   | K.SDVEAIFSKYGK.I |
| 1343.7273 | 1342.7200 | 1342.6768 | 0.0432  | 31    | - 42  | 1    | ---  | K.SDVEAIFSKYGK.I |

---

11. Q16576 Score: 139 Expect: 2.6e-010 Histone-binding protein RBBP7 OS=Homo sapiens GN=RBBP7 PE=1 SV=1

Nominal mass ( $M_r$ ): 48132; Calculated pI value: 4.89

Fixed modifications: Carbamidomethyl (C)

Variable modifications: Oxidation (M)

Cleavage by Trypsin: cuts C-term side of KR unless next residue is P

Number of mass values searched: 24

Number of mass values matched: 7

Sequence Coverage: 10%

---

| Observed  | Mr (expt) | Mr (calc) | Delta   | Start | End   | Miss | Ions | Peptide                          |
|-----------|-----------|-----------|---------|-------|-------|------|------|----------------------------------|
| 934.4075  | 933.4002  | 933.4742  | -0.0740 | 251   | - 257 | 0    | ---  | K.LMIWDTR.S                      |
| 934.4961  | 933.4888  | 933.4742  | 0.0146  | 251   | - 257 | 0    | 17   | K.LMIWDTR.S                      |
| 973.5508  | 972.5435  | 972.5392  | 0.0043  | 296   | - 303 | 0    | 16   | K.TVALWDLR.N                     |
| 1067.5367 | 1066.5294 | 1066.5155 | 0.0139  | 120   | - 128 | 0    | 42   | K.INHEGEVNR.A                    |
| 1321.6486 | 1320.6413 | 1320.7077 | -0.0664 | 15    | - 24  | 1    | ---  | R.VINEEYKIWK.K                   |
| 1428.6493 | 1427.6420 | 1427.7231 | -0.0811 | 131   | - 142 | 0    | ---  | R.YMPQNPHEIATK.T + Oxidation (M) |
| 1428.7227 | 1427.7154 | 1427.7231 | -0.0077 | 131   | - 142 | 0    | 24   | R.YMPQNPHEIATK.T + Oxidation (M) |

---

12. Q14566 Score: 95 Expect: 0.0031 Minichromosome maintenance complex 6

Nominal mass (Mr): 94002; Calculated pI value: 5.32

Fixed modifications: Carbamidomethyl (C)

Variable modifications: Oxidation (M)

Cleavage by Trypsin: cuts C-term side of KR unless next residue is P

Number of mass values searched: 22

Number of mass values matched: 10

Sequence Coverage: 13%

| Observed  | Mr (expt) | Mr (calc) | ppm    | Start | End   | Miss | Peptide                         |
|-----------|-----------|-----------|--------|-------|-------|------|---------------------------------|
| 970.4852  | 969.4779  | 969.4742  | 3.81   | 86    | - 92  | 0    | K.LMIWDTR.S                     |
| 1031.4950 | 1030.4877 | 1030.4542 | 32.5   | 715   | - 722 | 0    | K.LMIWDTR.S                     |
| 1136.5860 | 1135.5788 | 1135.5986 | -17.44 | 566   | - 574 | 0    | K.TVALWDLR.N                    |
| 1282.7025 | 1281.6952 | 1281.6903 | 3.83   | 86    | - 95  | 0    | K.INHEGEVNR.A                   |
| 1359.7176 | 1358.7103 | 1358.6976 | 9.37   | 518   | - 529 | 1    | R.VINEEYKIWK.K                  |
| 1471.7279 | 1470.7206 | 1470.7143 | 4.28   | 109   | - 120 | 1    | R.VINEEYKIWK.K                  |
| 1617.8218 | 1616.8146 | 1616.8167 | -1.32  | 296   | - 309 | 1    | R.VINEEYKIWK.K                  |
| 1629.8884 | 1628.8811 | 1628.8885 | -4.57  | 46    | - 58  | 1    | R.VINEEYKIWK.K                  |
| 1685.8642 | 1684.8569 | 1684.8533 | 2.17   | 497   | - 512 | 0    | R.YMPQNPHIATK.T + Oxidation (M) |
| 2104.0626 | 2103.0553 | 2103.0266 | 13.6   | 383   | - 402 | 0    | R.YMPQNPHIATK.T + Oxidation (M) |

13. P33993 Score: 119 Expect: 2.8e-07 Minichromosome maintenance complex 7

Nominal mass (Mr): 81856; Calculated pI value: 5.98

Fixed modifications: Carbamidomethyl (C)

Variable modifications: Oxidation (M)

Cleavage by Trypsin: cuts C-term side of KR unless next residue is P

Number of mass values searched: 18

Number of mass values matched: 11

Sequence Coverage: 15%

---

| Observed  | Mr (expt) | Mr (calc) | ppm    | Start | End   | Miss | Peptide                          |
|-----------|-----------|-----------|--------|-------|-------|------|----------------------------------|
| 849.4602  | 848.4529  | 848.4504  | 2.91   | 33    | - 39  | 0    | K.YGNQLVR.L                      |
| 1029.5913 | 1028.5840 | 1028.5978 | -13.40 | 472   | - 481 | 0    | K.AGILTTLNAR.C                   |
| 1094.5750 | 1093.5678 | 1093.5768 | -8.22  | 388   | - 396 | 0    | K.SQLLSYIDR.L                    |
| 1187.6596 | 1186.6523 | 1186.6670 | -12.40 | 408   | - 420 | 0    | R.GSSGVGLTAAVLR.D                |
| 1258.6384 | 1257.6311 | 1257.6353 | -3.35  | 97    | - 106 | 0    | K.DVLDVYIEHR.L                   |
| 1317.6729 | 1316.6657 | 1316.6936 | -21.21 | 252   | - 263 | 0    | R.SITVLVEGENTR.I                 |
| 1363.6683 | 1362.6610 | 1362.6714 | -7.64  | 482   | - 494 | 0    | R.CSILAAANPAYGR.Y                |
| 1449.6691 | 1448.6618 | 1448.6718 | -6.89  | 121   | - 132 | 0    | R.SPQNQYPAELMR.R + Oxidation (M) |
| 1473.7885 | 1472.7812 | 1472.8100 | -19.52 | 654   | - 666 | 0    | R.TQRPADVIFATVR.E                |
| 1589.7974 | 1588.7901 | 1588.7780 | 7.64   | 121   | - 133 | 1    | R.SPQNQYPAELMRR.F                |
| 1825.8821 | 1824.8748 | 1824.9271 | -28.67 | 133   | - 147 | 1    | R.RFELYFQGPSSNKPR.V              |

---

14. Q01105 Score: 82 Expect: 0.00012 Protein SET

Nominal mass (Mr): 33469; Calculated pI value: 4.23

Fixed modifications: Carbamidomethyl (C)

Variable modifications: Oxidation (M)

Cleavage by Trypsin: cuts C-term side of KR unless next residue is P

Number of mass values searched: 28

Number of mass values matched: 8

Sequence Coverage: 22%

---

| Observed  | Mr (expt) | Mr (calc) | Delta   | Start | End   | Miss | Peptide            |
|-----------|-----------|-----------|---------|-------|-------|------|--------------------|
| 908.4929  | 907.4856  | 907.4763  | 0.0093  | 69    | - 75  | 1    | K.VEQKYNK.L        |
| 1063.5929 | 1062.5856 | 1062.5974 | -0.0118 | 76    | - 83  | 1    | K.LRQPFFQK.R       |
| 950.5245  | 949.5172  | 949.5134  | 0.0039  | 78    | - 84  | 1    | R.QPFFQKR.S        |
| 1208.6066 | 1207.5993 | 1207.5972 | 0.0021  | 123   | - 132 | 0    | R.VEVTEFEDIK.S     |
| 1671.8676 | 1670.8603 | 1670.8151 | 0.0452  | 123   | - 136 | 1    | R.VEVTEFEDIKSGYR.I |
| 1840.8586 | 1839.8513 | 1839.7991 | 0.0522  | 137   | - 150 | 0    | R.IDFYFDENPYFENK.V |
| 1446.6627 | 1445.6554 | 1445.6422 | 0.0132  | 155   | - 167 | 0    | K.EFHLNESGDPSSK.S  |
| 891.4749  | 890.4676  | 890.4861  | -0.0185 | 168   | - 174 | 1    | K.STEIKWK.S        |

---

15. Q92688 Score: 103 Expect: 1e-006 Acidic leucine-rich nuclear phosphoprotein 32 family member B OS=Homo sapiens  
GN=ANP32B PE=1 SV=1

Nominal mass ( $M_r$ ): 28941; Calculated pI value: 3.94

Fixed modifications: Carbamidomethyl (C)

Variable modifications: Oxidation (M)

Cleavage by Trypsin: cuts C-term side of KR unless next residue is P

Number of mass values searched: 65

Number of mass values matched: 13

Sequence Coverage: 40%

---

| Observed  | Mr (expt) | Mr (calc) | Delta   | Start | End   | Miss | Peptide                         |
|-----------|-----------|-----------|---------|-------|-------|------|---------------------------------|
| 860.4653  | 859.4580  | 859.4399  | 0.0181  | 69    | - 75  | 0    | K.LELSEN.R.I                    |
| 884.5167  | 883.5094  | 883.4988  | 0.0107  | 13    | - 20  | 1    | R.NRTPAAVR.E                    |
| 936.5888  | 935.5815  | 935.5665  | 0.0151  | 6     | - 12  | 1    | R.RIHLELR.N                     |
| 988.5496  | 987.5423  | 987.5349  | 0.0075  | 68    | - 75  | 1    | K.KLELSEN.R.I                   |
| 990.5106  | 989.5033  | 989.4852  | 0.0182  | 21    | - 28  | 0    | R.ELVLDNCK.S                    |
| 1015.5599 | 1014.5526 | 1014.5597 | -0.0071 | 102   | - 110 | 0    | K.DISTLEPLK.K                   |
| 1143.6549 | 1142.6476 | 1142.6547 | -0.0070 | 102   | - 111 | 1    | K.DISTLEPLKK.L                  |
| 1209.6169 | 1208.6096 | 1208.6111 | -0.0014 | 76    | - 86  | 0    | R.IFGGLDMLAEK.L + Oxidation (M) |
| 1256.7369 | 1255.7296 | 1255.7387 | -0.0091 | 100   | - 110 | 1    | K.LKDISTLEPLK.K                 |
| 1420.7927 | 1419.7854 | 1419.7834 | 0.0021  | 87    | - 99  | 0    | K.LPNLTHLNLSGK.L                |
| 1491.7391 | 1490.7318 | 1490.7035 | 0.0284  | 21    | - 33  | 1    | R.ELVLDNCKSNDGK.I               |
| 1566.8392 | 1565.8319 | 1565.8089 | 0.0230  | 138   | - 150 | 0    | K.LLPQLTYLDGYDR.E               |
| 1972.9976 | 1971.9903 | 1971.8996 | 0.0907  | 117   | - 132 | 0    | K.SLDLFNCEVTNLNDYR.E            |

---

16. P14866 Score: 72 Expect: 0.013 Heterogeneous nuclear ribonucleoprotein L, isoform CRA\_a [Homo sapiens]

Nominal mass (Mr): 60693; Calculated pI value: 6.81

Fixed modifications: Carbamidomethyl (C)

Variable modifications: Oxidation (M)

Cleavage by Trypsin: cuts C-term side of KR unless next residue is P

Number of mass values searched: 10

Number of mass values matched: 5

Sequence Coverage: 9%

---

| Observed  | Mr (expt) | Mr (calc) | ppm    | Start | End   | Miss | Peptide                               |
|-----------|-----------|-----------|--------|-------|-------|------|---------------------------------------|
| 923.4484  | 922.4411  | 922.4443  | -3.50  | 313   | - 321 | 0    | R.MGPPVGGHR.R + Oxidation (M)         |
| 977.5262  | 976.5189  | 976.5341  | -15.59 | 233   | - 240 | 0    | K.IEYAKPTR.L                          |
| 1076.5939 | 1075.5866 | 1075.6138 | -25.27 | 66    | - 75  | 0    | K.TPASPVVHIR.G                        |
| 1263.5970 | 1262.5898 | 1262.6295 | -31.48 | 537   | - 547 | 0    | K.NPNGPYPYTLK.L                       |
| 1881.9111 | 1880.9039 | 1880.8687 | 18.7   | 198   | - 214 | 0    | K.NGVQAMVEFDSVQSAQR.A + Oxidation (M) |

---



17. P19338 Score: 82 Expect: 0.0015 Nucleolin, isoform CRA\_c [Homo sapiens]

Nominal mass (Mr): 58576; Calculated pI value: 4.57

Fixed modifications: Carbamidomethyl (C)

Variable modifications: Oxidation (M)

Cleavage by Trypsin: cuts C-term side of KR unless next residue is P

Number of mass values searched: 16

Number of mass values matched: 8

Sequence Coverage: 15%

---

| Observed  | Mr (expt) | Mr (calc) | ppm    | Start | End   | Miss | Peptide                 |
|-----------|-----------|-----------|--------|-------|-------|------|-------------------------|
| 812.4602  | 811.4530  | 811.4552  | -2.73  | 381   | - 387 | 0    | R.LELQGPR.G             |
| 880.4012  | 879.3939  | 879.3835  | 11.9   | 294   | - 300 | 0    | K.GQNQDYR.G             |
| 940.5023  | 939.4950  | 939.5065  | -12.31 | 256   | - 263 | 0    | K.GIAYIEFK.T            |
| 1000.5338 | 999.5265  | 999.5349  | -8.38  | 160   | - 168 | 0    | K.NDLAVVDVR.I           |
| 1160.5628 | 1159.5555 | 1159.5761 | -17.75 | 284   | - 293 | 0    | R.SISLYYTGEK.G          |
| 1178.5694 | 1177.5621 | 1177.5615 | 0.53   | 237   | - 246 | 1    | K.EVFEDAAEIR.L          |
| 1192.6042 | 1191.5969 | 1191.6095 | -10.62 | 426   | - 436 | 0    | R.IVTDRETGSSK.G         |
| 2200.0845 | 2199.0772 | 2199.0179 | 27.0   | 404   | - 423 | 1    | K.GLSEDTTEETLKESFDGSR.A |

---

18. Q99733 Score: 73 Expect: 0.012 Nucleosome assembly protein 1-like 4 OS=Homo sapiens GN=NAP1L4 PE=1 SV=1

Nominal mass ( $M_r$ ): 42968; Calculated pI value: 4.60

Fixed modifications: Carbamidomethyl (C)

Variable modifications: Oxidation (M)

Cleavage by Trypsin: cuts C-term side of KR unless next residue is P

Number of mass values searched: 12

Number of mass values matched: 6

Sequence Coverage: 18%

---

| Observed  | Mr(expt)  | Mr(calc)  | ppm    | Start | End   | Miss | Peptide                        |
|-----------|-----------|-----------|--------|-------|-------|------|--------------------------------|
| 899.5310  | 898.5237  | 898.5236  | 0.16   | 37    | - 44  | 0    | R.VLAALQER.L                   |
| 1217.5430 | 1216.5357 | 1216.5870 | -42.16 | 27    | - 36  | 0    | K.LTDQVMQNPR.V + Oxidation (M) |
| 1328.6332 | 1327.6259 | 1327.6812 | -41.64 | 95    | - 105 | 0    | K.YAALYQPLFDK.R                |
| 1336.6024 | 1335.5952 | 1335.6095 | -10.75 | 84    | - 93  | 0    | K.FYEEVHDLER.K                 |
| 1484.7619 | 1483.7546 | 1483.7823 | -18.66 | 95    | - 106 | 1    | K.YAALYQPLFDKR.K               |
| 1910.9463 | 1909.9390 | 1909.9785 | -20.70 | 45    | - 61  | 0    | R.LDNVPHTPSSYIETLPK.A          |

---

19. Q9Y3F4 Score: 90 Expect: 2.2e-005 Serine-threonine kinase receptor-associated protein OS=Homo sapiens GN=STRAP PE=1 SV=1

Nominal mass ( $M_r$ ): 38756; Calculated pI value: 4.98

Fixed modifications: Carbamidomethyl (C)

Variable modifications: Oxidation (M)

Cleavage by Trypsin: cuts C-term side of KR unless next residue is P

Number of mass values searched: 13

Number of mass values matched: 2

Sequence Coverage: 5%

---

| Observed  | Mr(expt)  | Mr(calc)  | Delta   | Start | End   | Miss | Ions | Peptide                |
|-----------|-----------|-----------|---------|-------|-------|------|------|------------------------|
| 1900.8192 | 1899.8119 | 1899.8486 | -0.0367 | 273   | - 290 | 0    | 81   | R.FSPDGELYASGSEDGTLR.L |
| 1900.8564 | 1899.8491 | 1899.8486 | 0.0005  | 273   | - 290 | 0    | (80) | R.FSPDGELYASGSEDGTLR.L |

---

20. P06576 Score: 108 Expect: 3.2e-007 ATP synthase subunit beta, mitochondrial OS=Homo sapiens GN=ATP5B PE=1 SV=3

Nominal mass ( $M_r$ ): 56525; Calculated pI value: 5.26

Fixed modifications: Carbamidomethyl (C)

Variable modifications: Oxidation (M)

Cleavage by Trypsin: cuts C-term side of KR unless next residue is P

Number of mass values searched: 17

Number of mass values matched: 3

Sequence Coverage: 6%

---

| Observed  | Mr(expt)  | Mr(calc)  | Delta   | Start | End   | Miss | Ions | Peptide                            |
|-----------|-----------|-----------|---------|-------|-------|------|------|------------------------------------|
| 1617.8093 | 1616.8020 | 1616.7980 | 0.0040  | 265   | - 279 | 0    | 16   | K.VALVYQMNEPPGAR.A + Oxidation (M) |
| 1988.0143 | 1987.0070 | 1987.0262 | -0.0191 | 388   | - 406 | 0    | ---  | R.AIAELGIYPAVDPLDSTSR.I            |
| 1988.0284 | 1987.0211 | 1987.0262 | -0.0050 | 388   | - 406 | 0    | 78   | R.AIAELGIYPAVDPLDSTSR.I            |

---

21. P11021 Score: 164 Expect: 9e-12 Heat shock 70 kDa protein

Nominal mass (Mr): 72185; Calculated pI value: 5.03

Fixed modifications: Carbamidomethyl (C)

Variable modifications: Oxidation (M)

Cleavage by Trypsin: cuts C-term side of KR unless next residue is P

Number of mass values searched: 27

Number of mass values matched: 15

Sequence Coverage: 29%

| Observed  | Mr (expt) | Mr (calc) | ppm    | Start | End   | Miss | Peptide                          |
|-----------|-----------|-----------|--------|-------|-------|------|----------------------------------|
| 997.5235  | 996.5162  | 996.5101  | 6.19   | 297   | - 305 | 0    | K.ALSSQHQR.I                     |
| 1074.5627 | 1073.5554 | 1073.5465 | 8.25   | 523   | - 531 | 0    | K.ITITNDQNR.L                    |
| 1191.6326 | 1190.6254 | 1190.6295 | -3.49  | 464   | - 473 | 0    | K.VYEGERPLTK.D                   |
| 1210.5730 | 1209.5657 | 1209.5778 | -10.03 | 376   | - 385 | 1    | K.EFFNGKEPSR.G                   |
| 1233.6096 | 1232.6023 | 1232.6183 | -12.97 | 186   | - 197 | 0    | K.DAGTIAGLNVMR.I + Oxidation (M) |
| 1460.7510 | 1459.7438 | 1459.7518 | -5.54  | 353   | - 366 | 0    | K.SDIDEIVLVGGSTR.I               |
| 1528.7387 | 1527.7314 | 1527.7391 | -5.07  | 324   | - 335 | 1    | R.AKFEELNMDLFR.S + Oxidation (M) |
| 1555.7690 | 1554.7617 | 1527.7391 | -15.79 | 47    | - 60  | 1    | K.NGRVEIANDQGNI.I                |
| 1566.7781 | 1565.7708 | 1565.7726 | -1.11  | 61    | - 74  | 0    | R.ITPSYVAFTPEGER.L               |
| 1588.8400 | 1587.8327 | 1587.8468 | -8.85  | 352   | - 366 | 1    | K.KSDIDEIVLVGGSTR.I              |
| 1604.8328 | 1603.8255 | 1603.8570 | -19.61 | 124   | - 138 | 0    | K.TKPVIQVDIGGGQTK.T              |
| 1815.9849 | 1814.9776 | 1814.9890 | -6.26  | 198   | - 214 | 1    | R.IINEPTAAAIAYGLDKR.E            |
| 1887.9672 | 1886.9599 | 1886.9639 | -2.14  | 165   | - 181 | 0    | K.VTHAVVTVPAYFNDAQR.Q            |
| 1934.0055 | 1932.9982 | 1933.0058 | -3.91  | 474   | - 491 | 0    | K.DNHLGTFDLTGIPPAPR.G            |
| 2164.9837 | 2163.9764 | 2163.9848 | -3.87  | 306   | - 323 | 0    | R.IEIESFYEGEDFSETLTR.A           |
