# Supplementary material
Source: PubMed Central journal article supplement (PMC4047465)

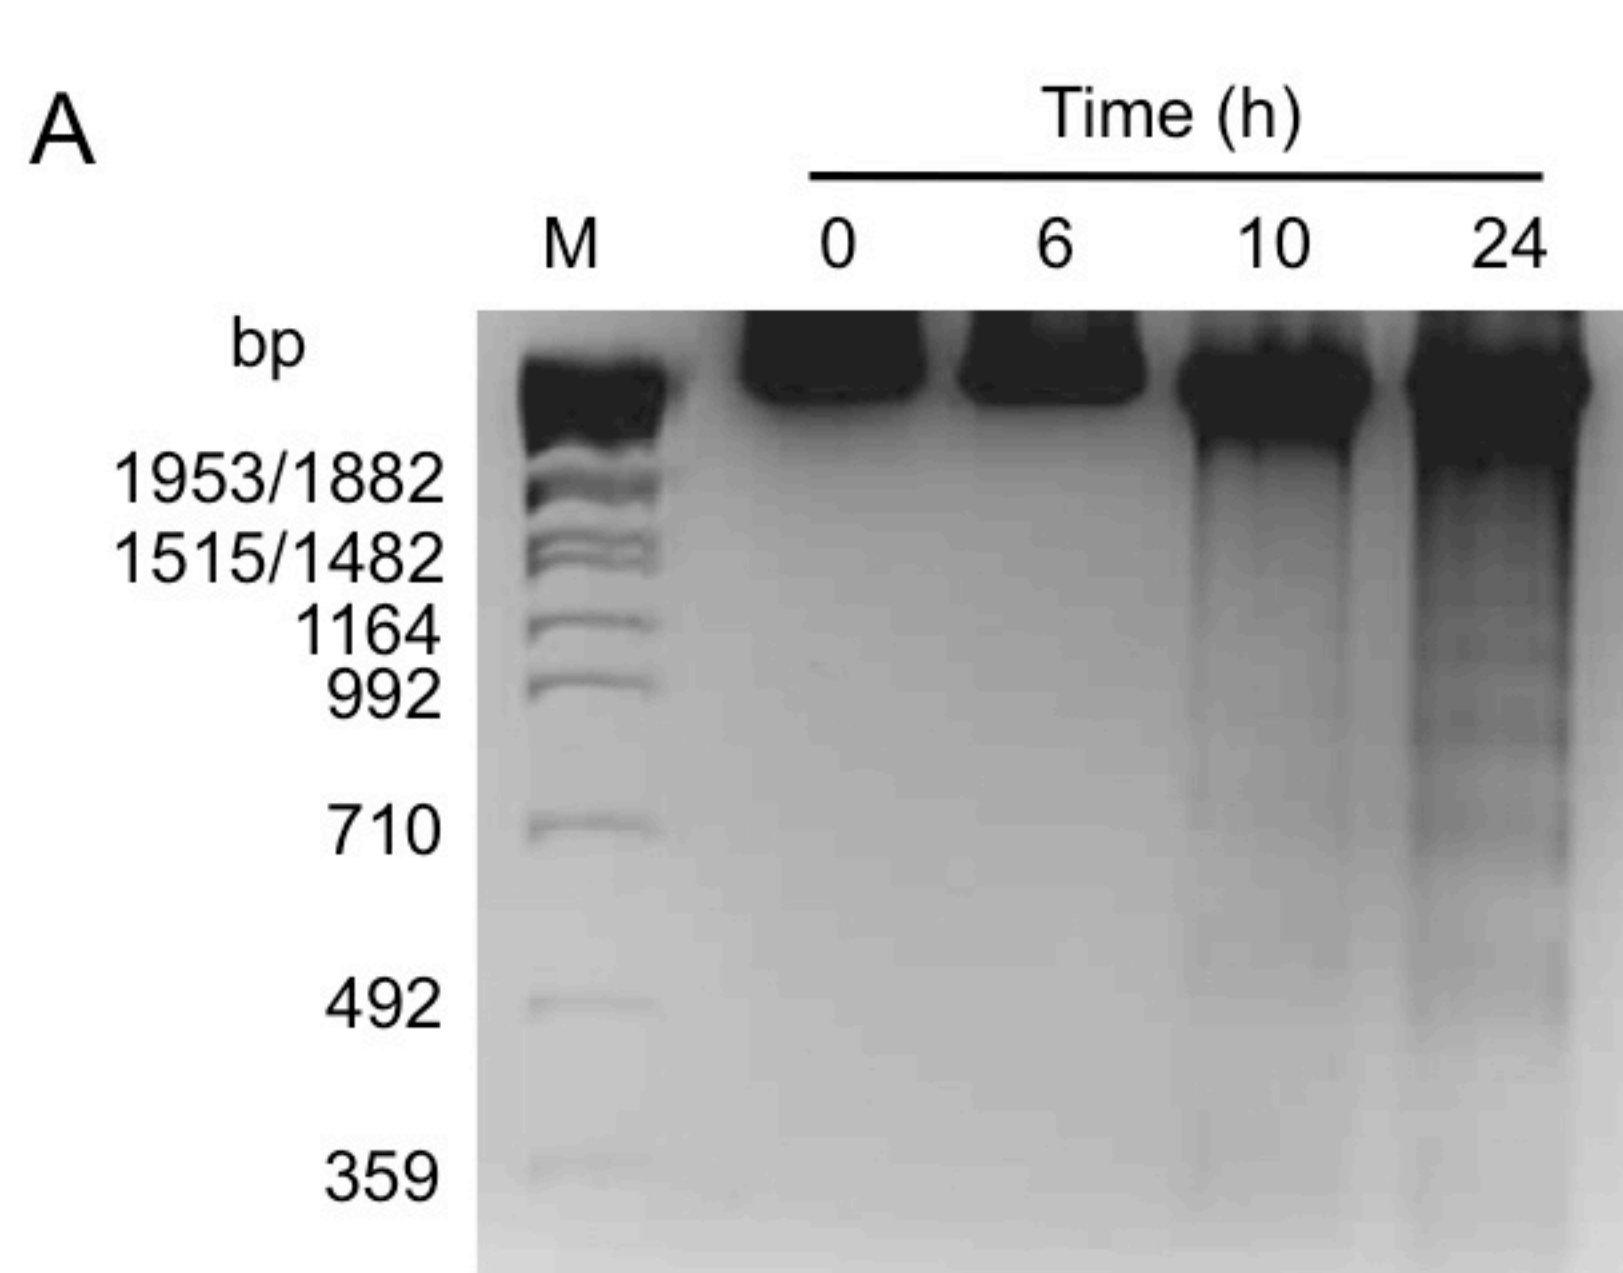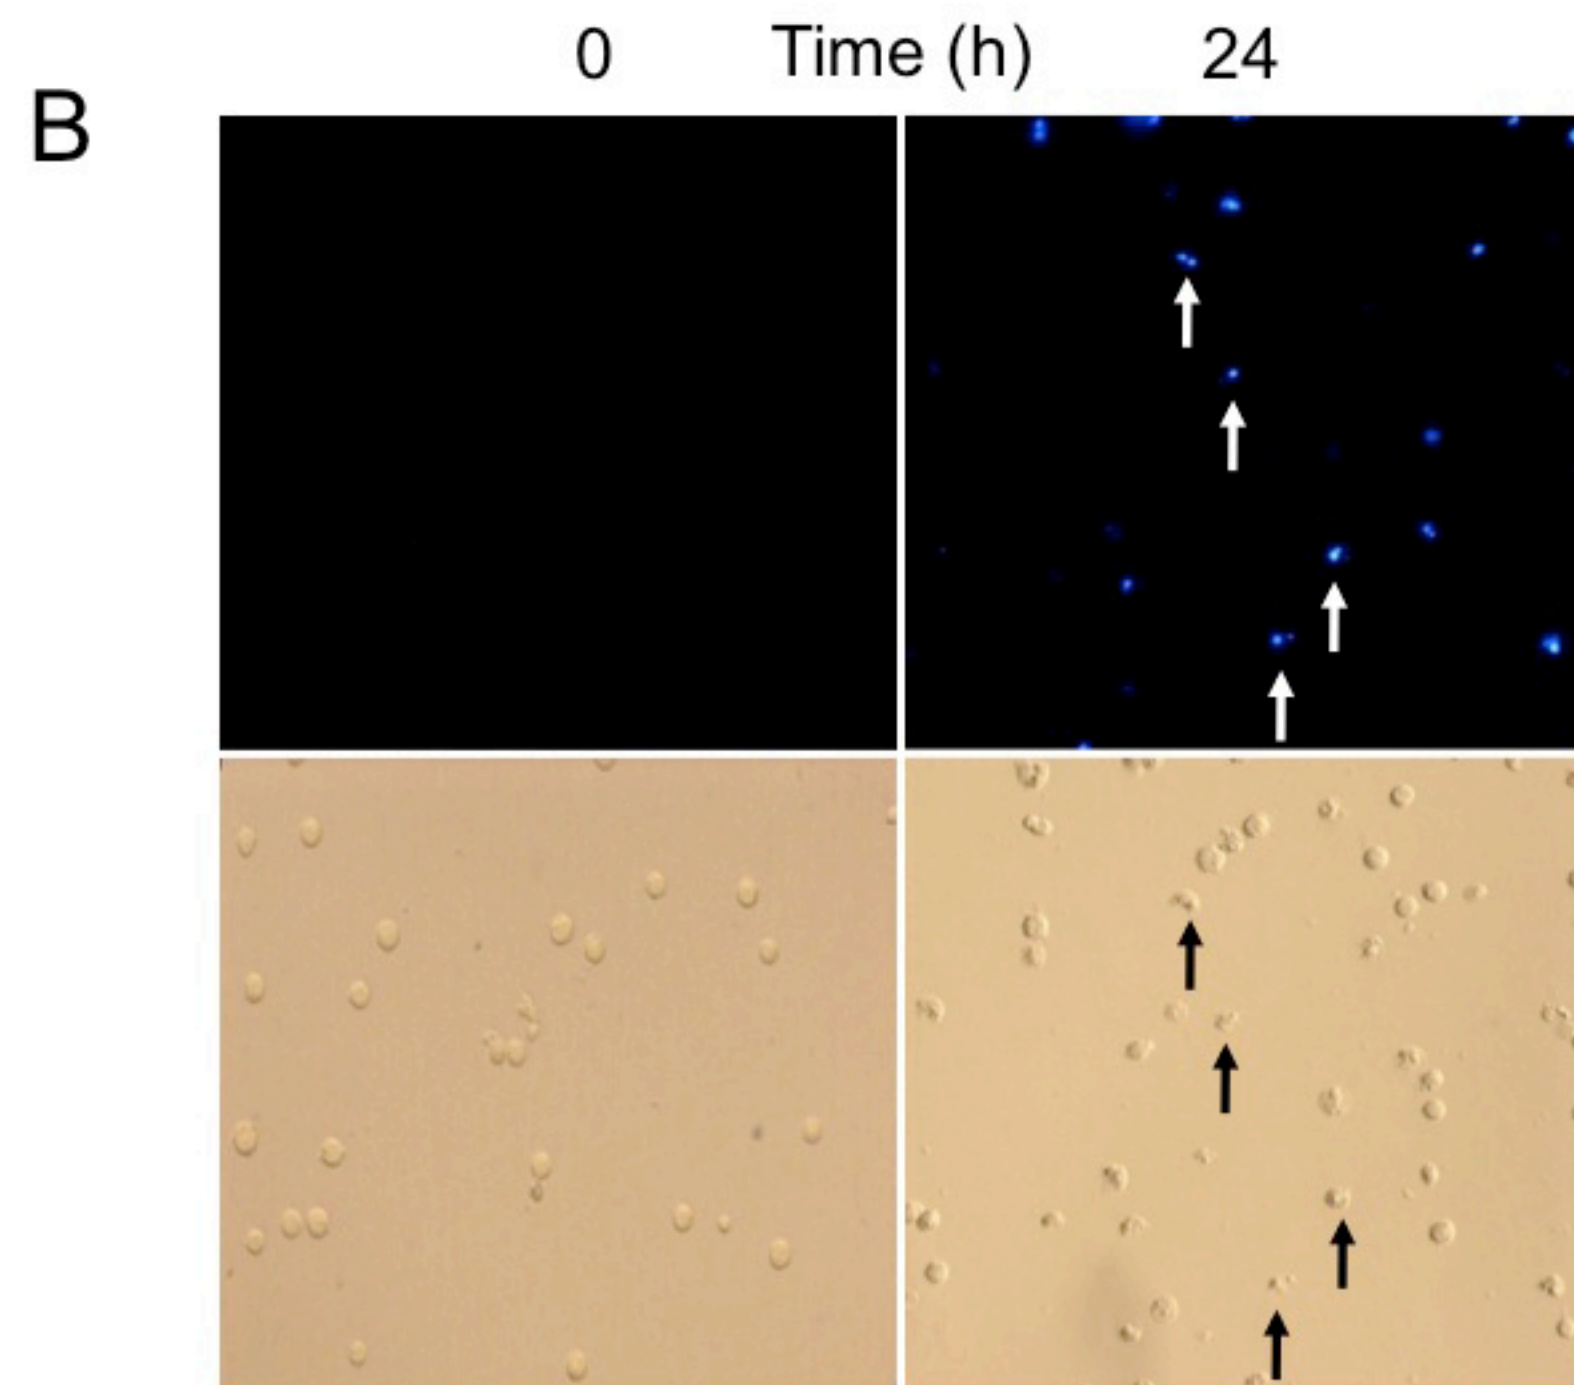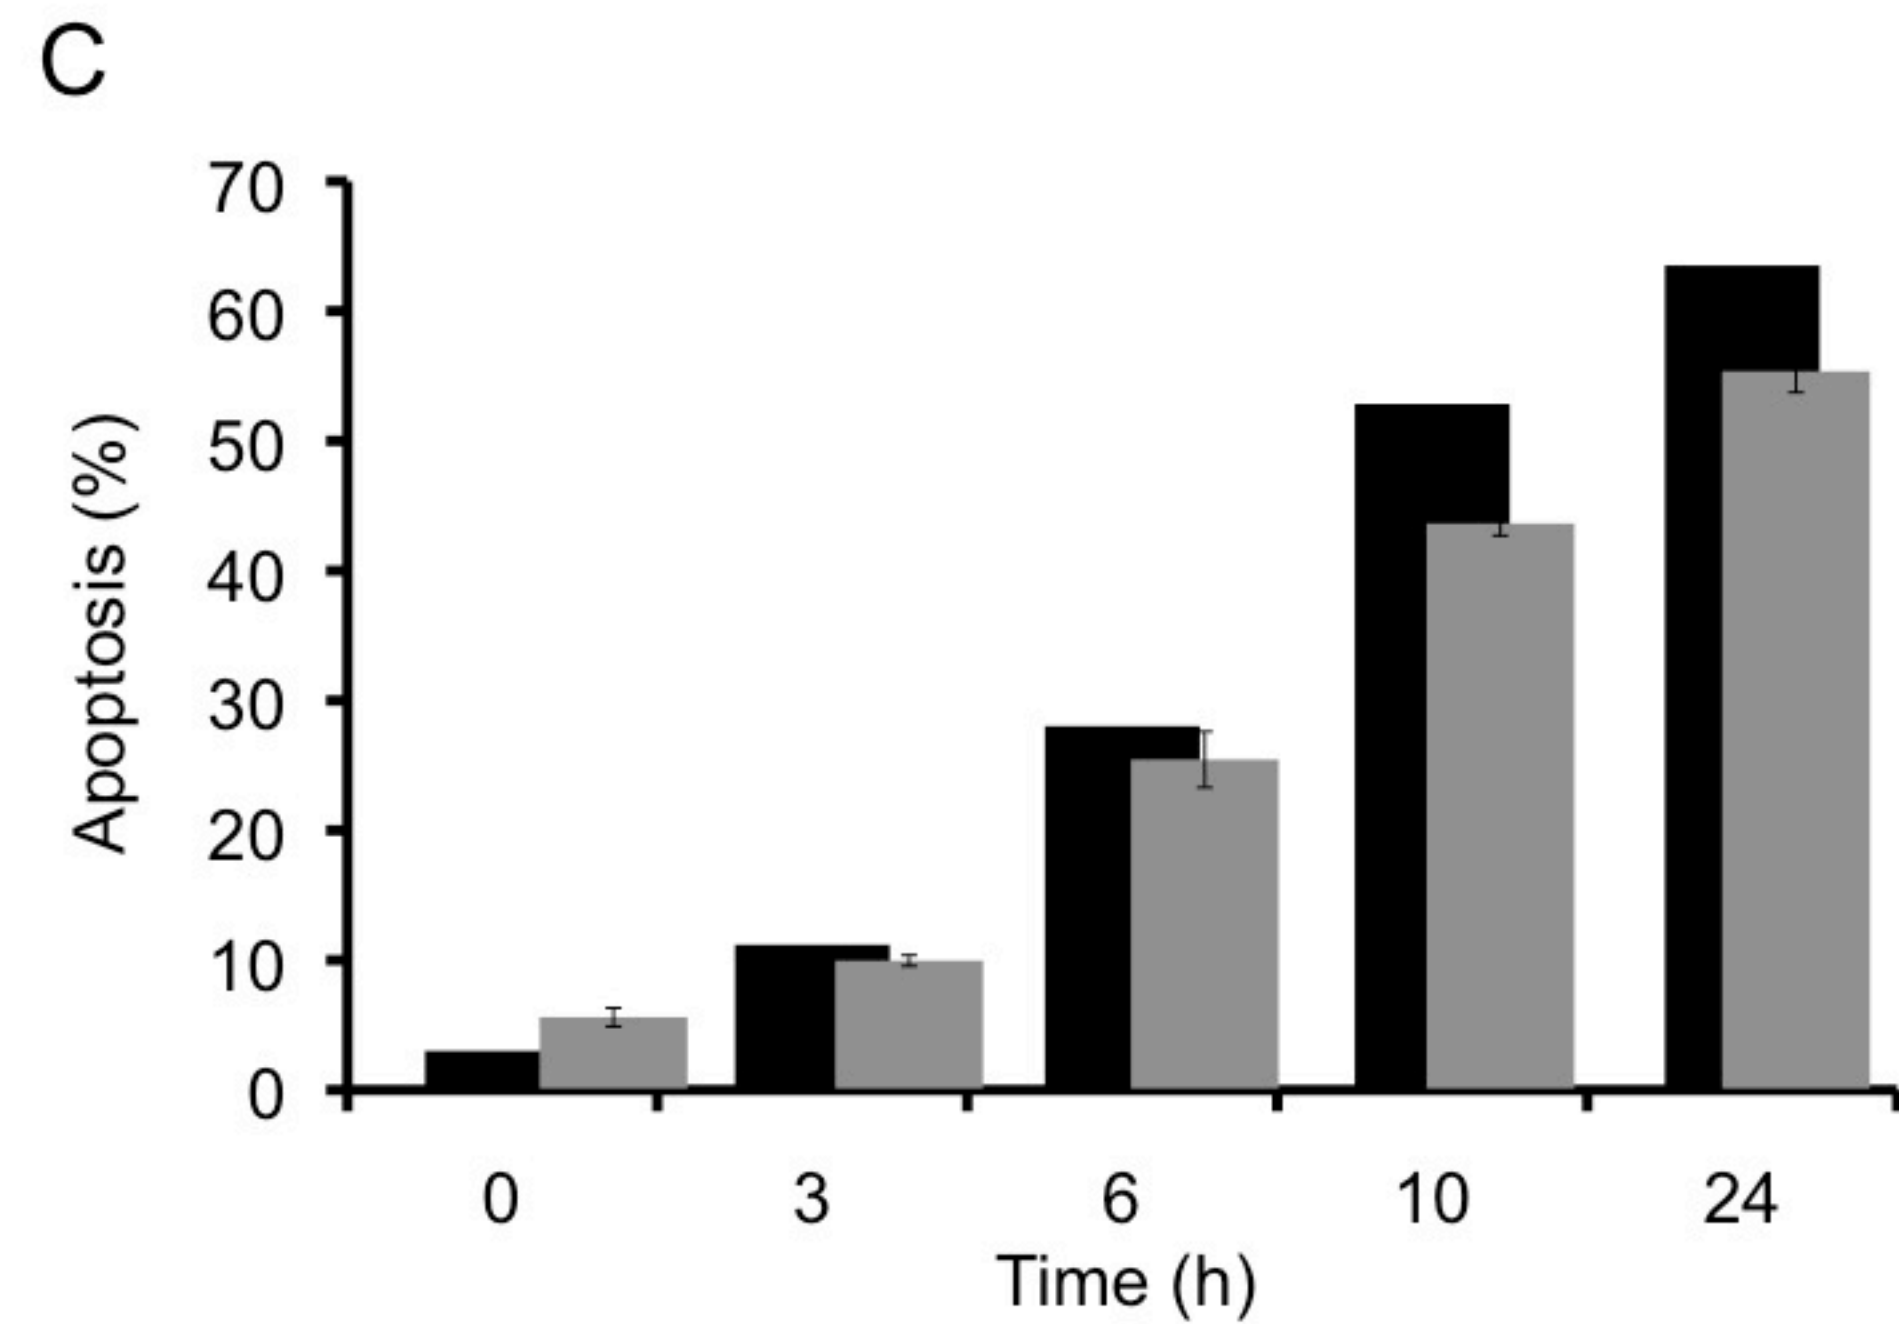

Figure S1

Supplement: supp_M113.034322_mcp.M113.034322-1.pdf [file supp_M113.034322_mcp.M113.034322-1.pdf]

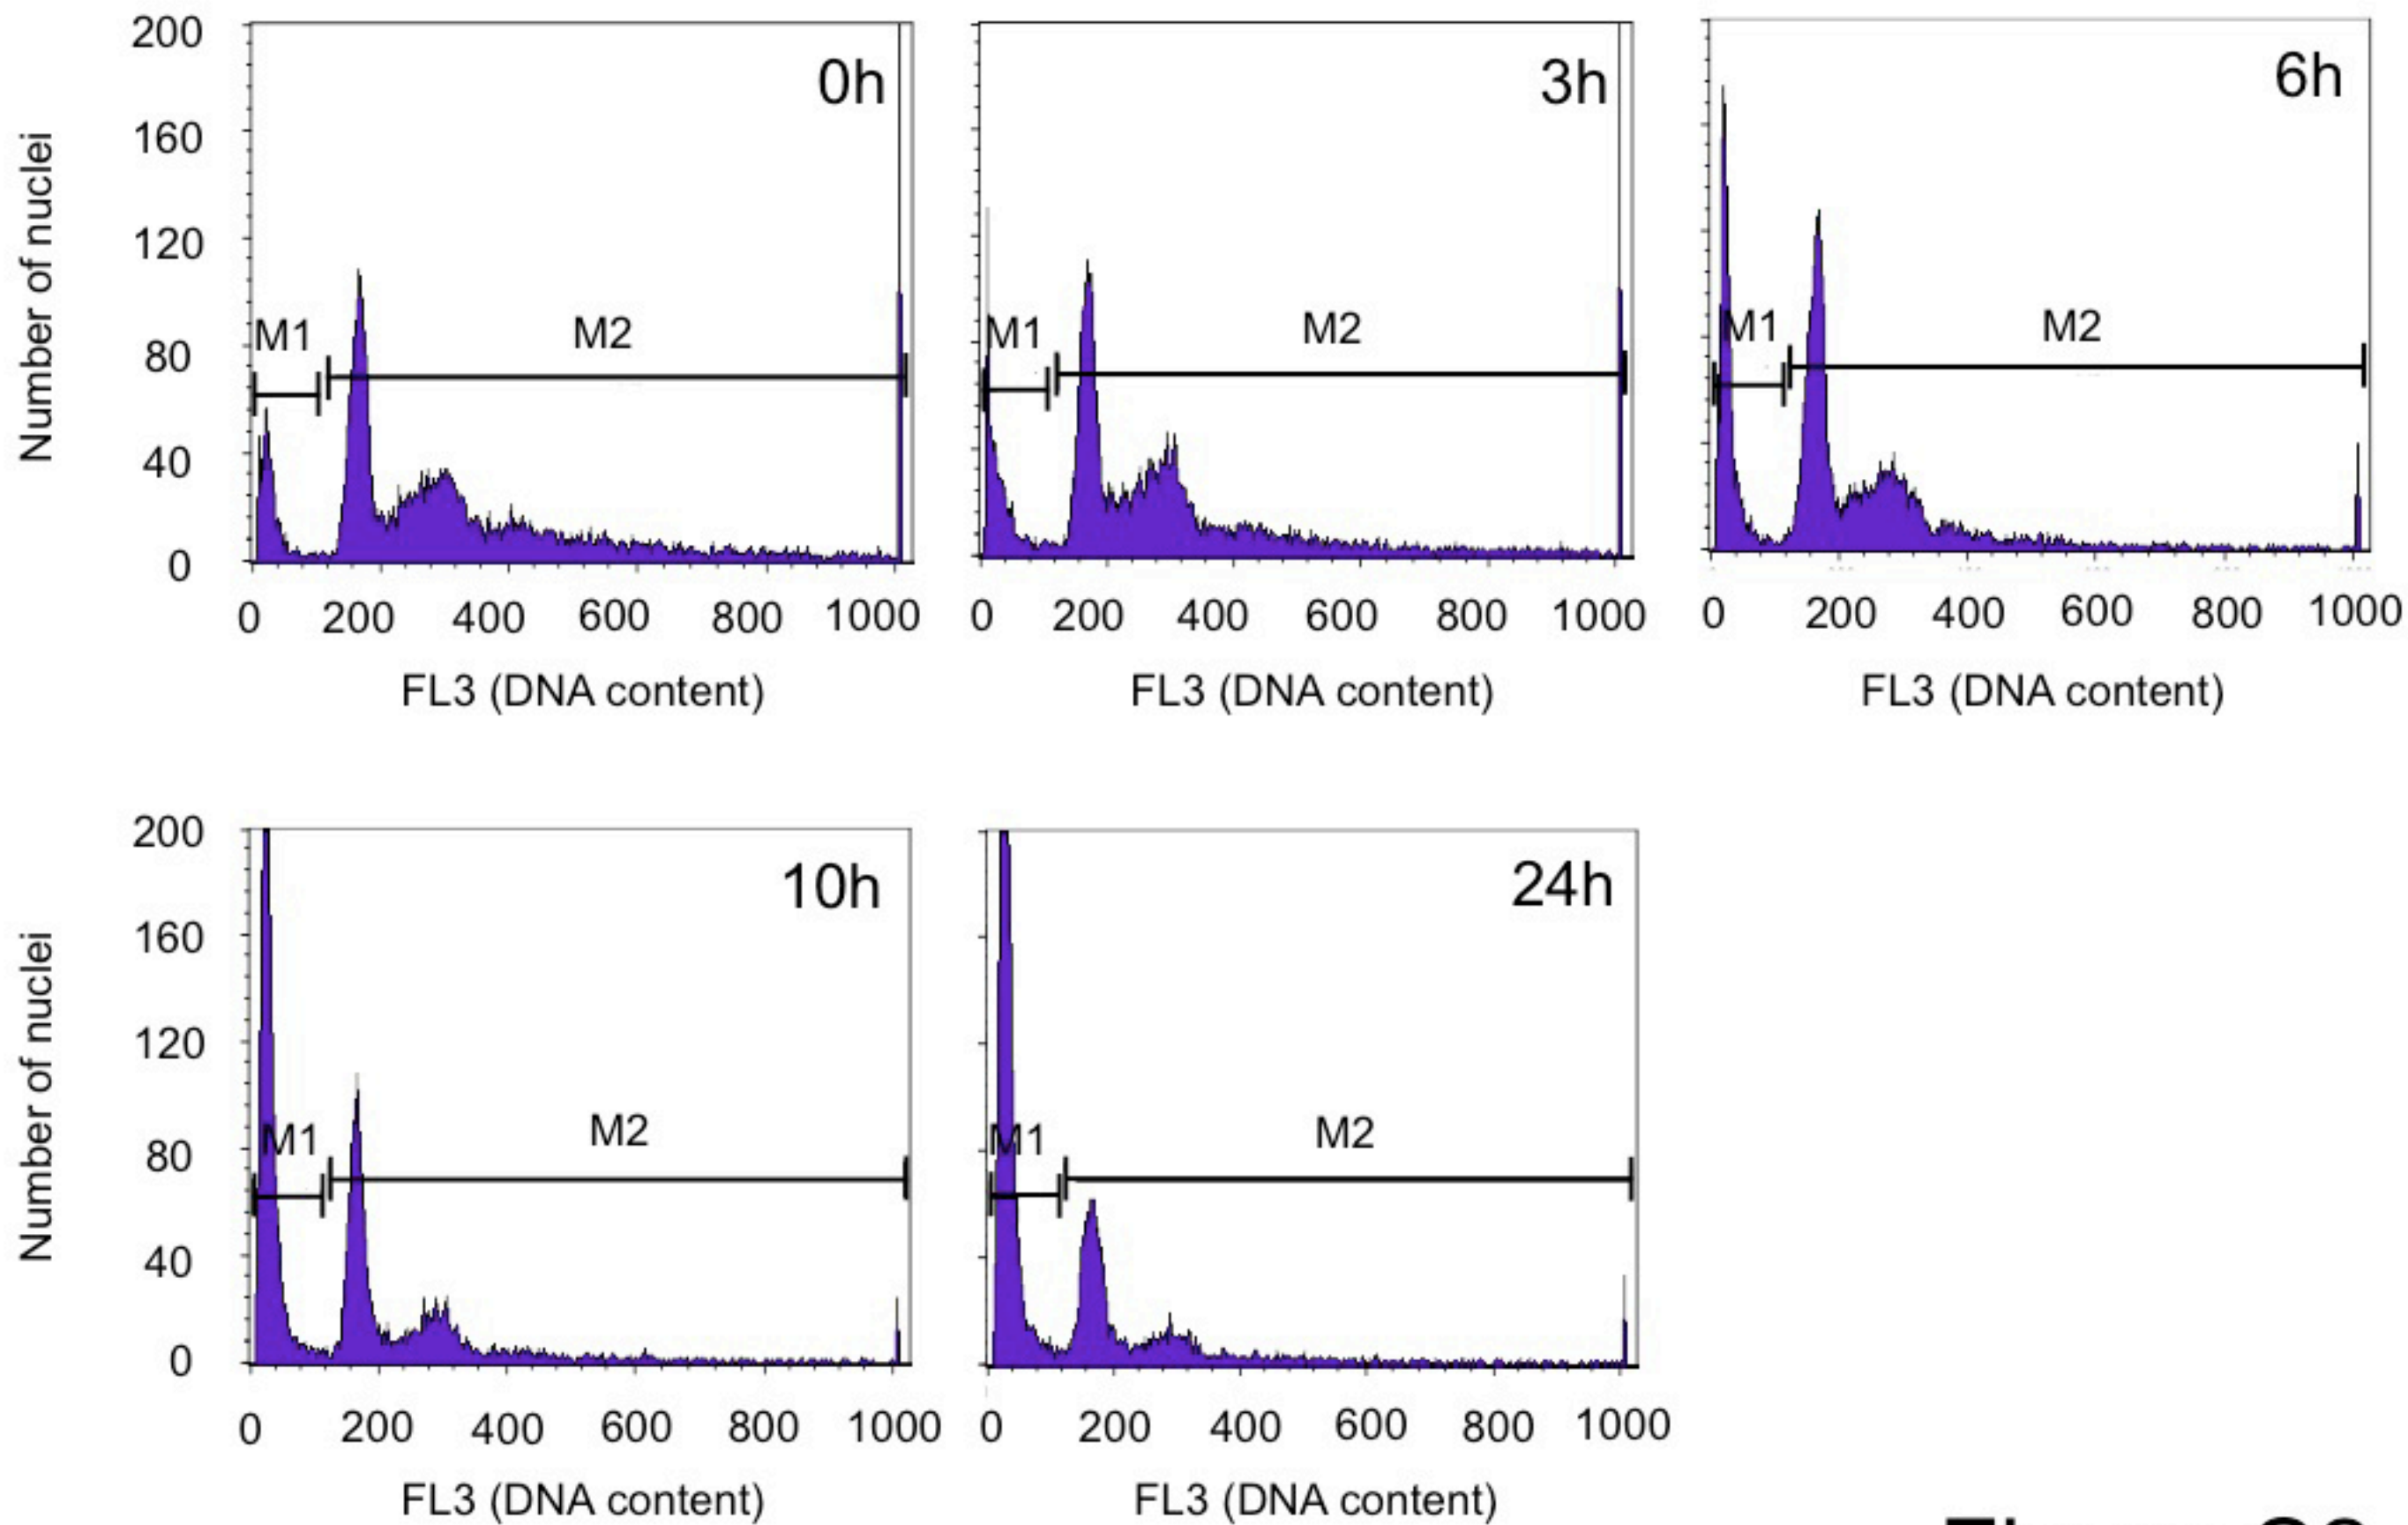

Figure S2

Supplement: supp_M113.034322_mcp.M113.034322-2.pdf [file supp_M113.034322_mcp.M113.034322-2.pdf]

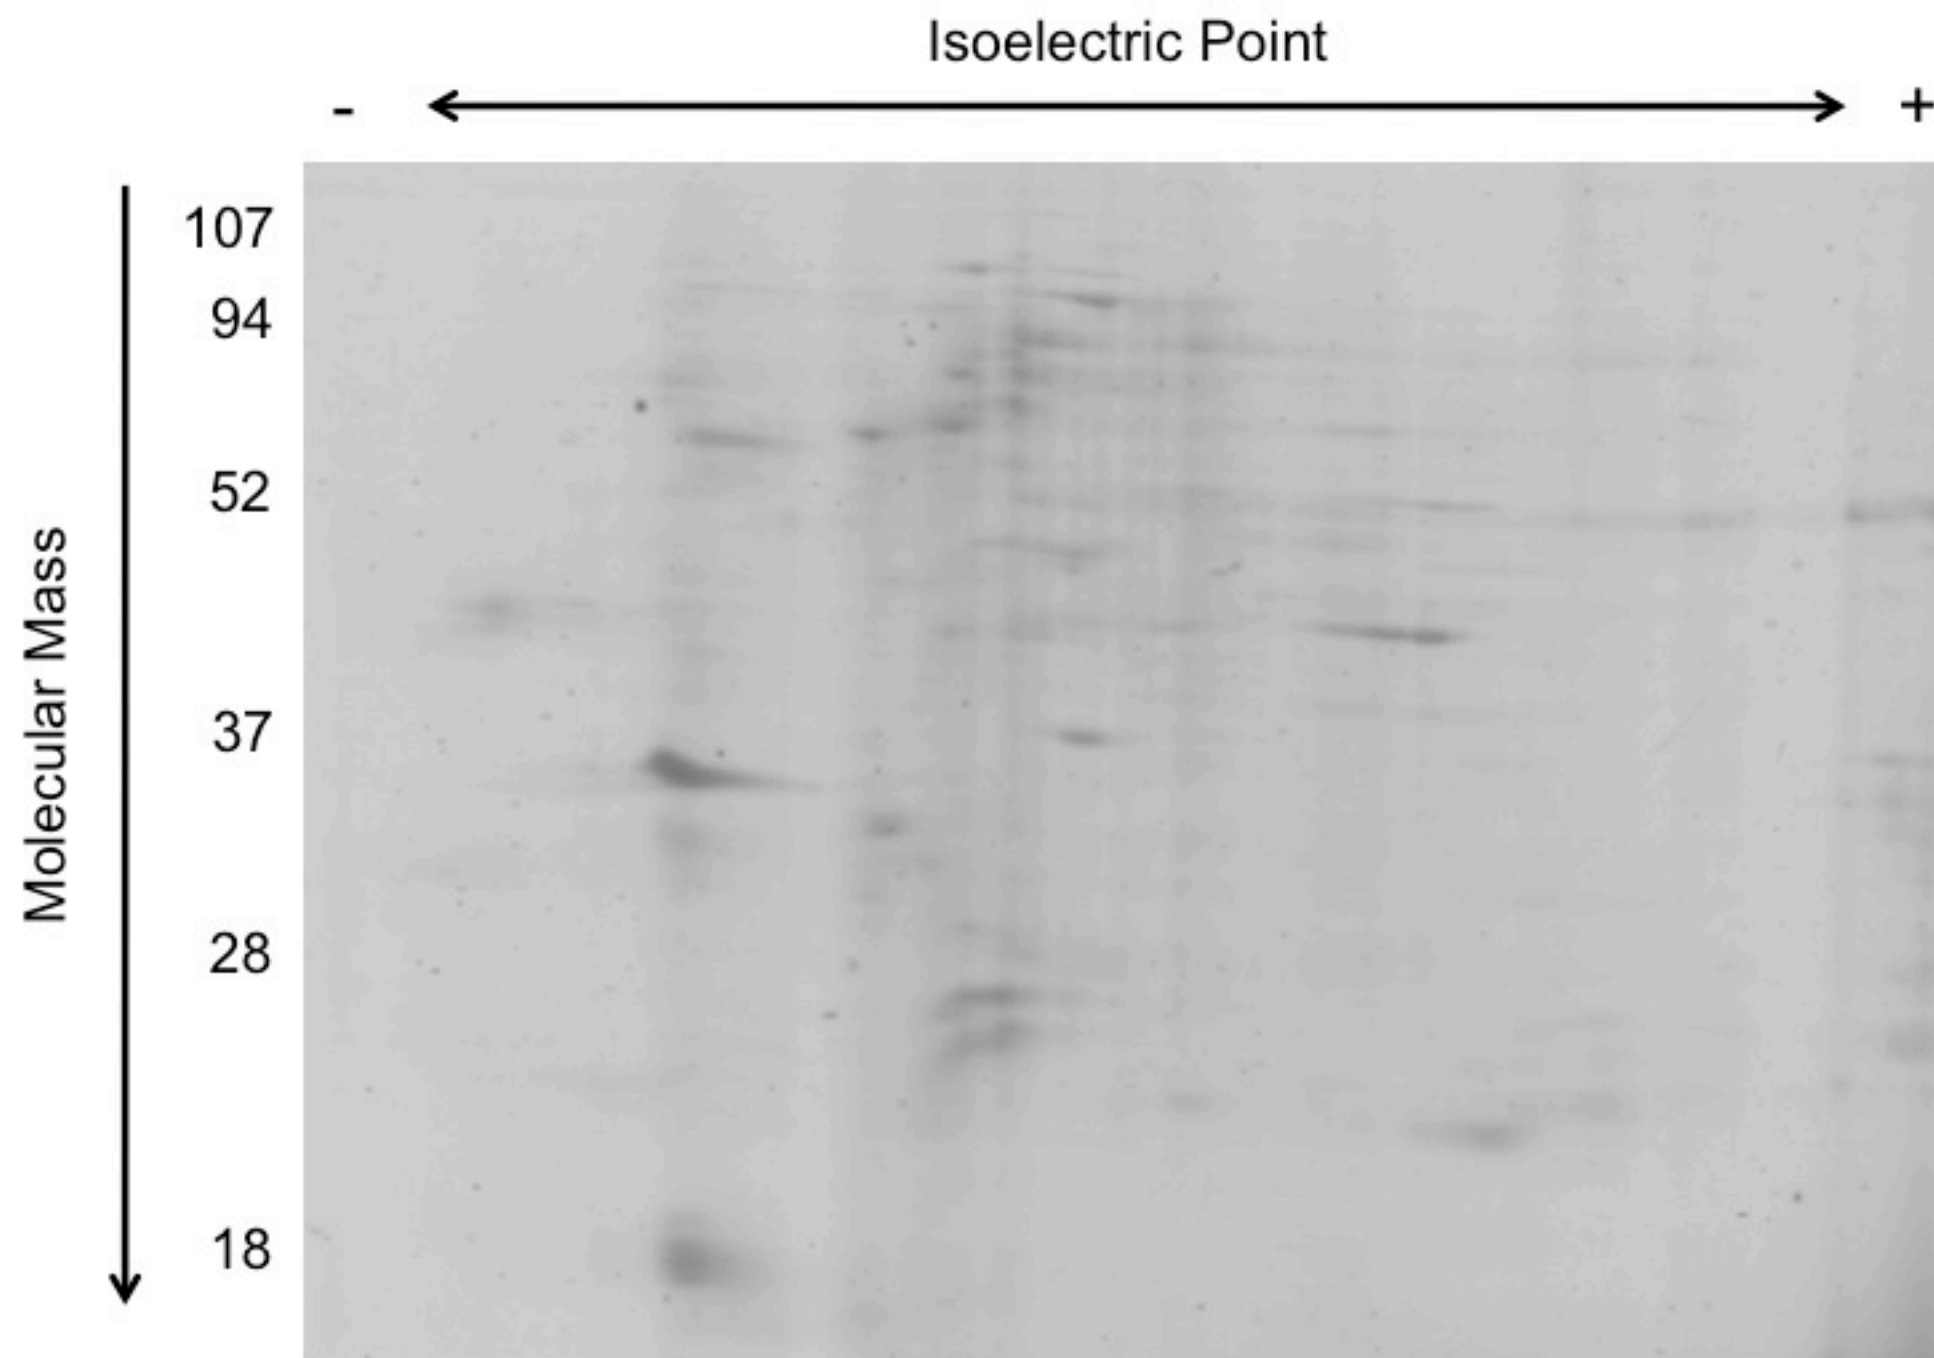

Figure S3. Panel A

Supplement: supp_M113.034322_mcp.M113.034322-3.pdf [file supp_M113.034322_mcp.M113.034322-3.pdf]

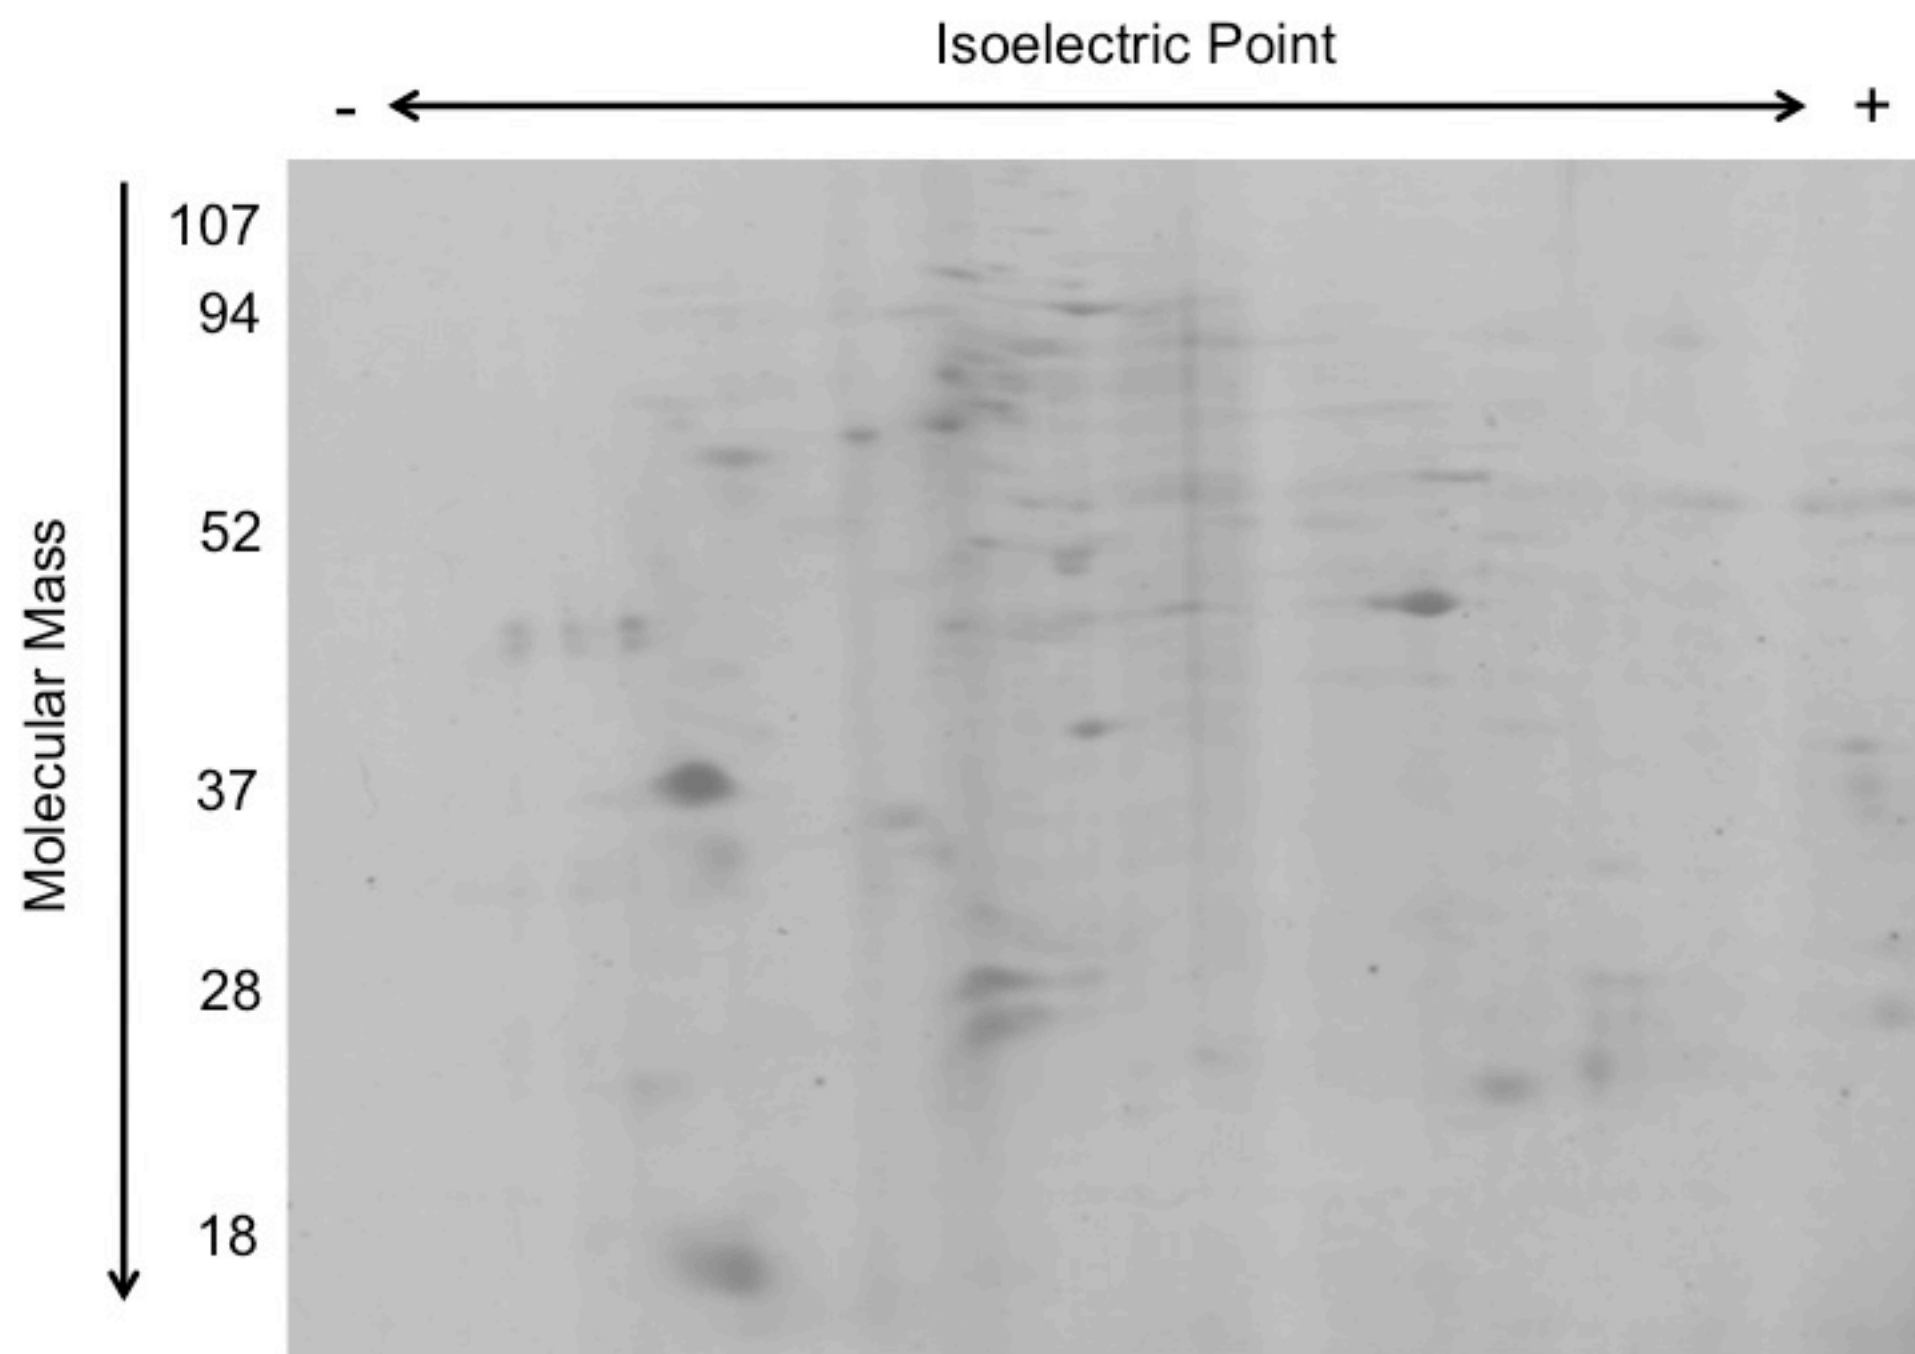

Figure S3. Panel B

Supplement: supp_M113.034322_mcp.M113.034322-4.pdf [file supp_M113.034322_mcp.M113.034322-4.pdf]

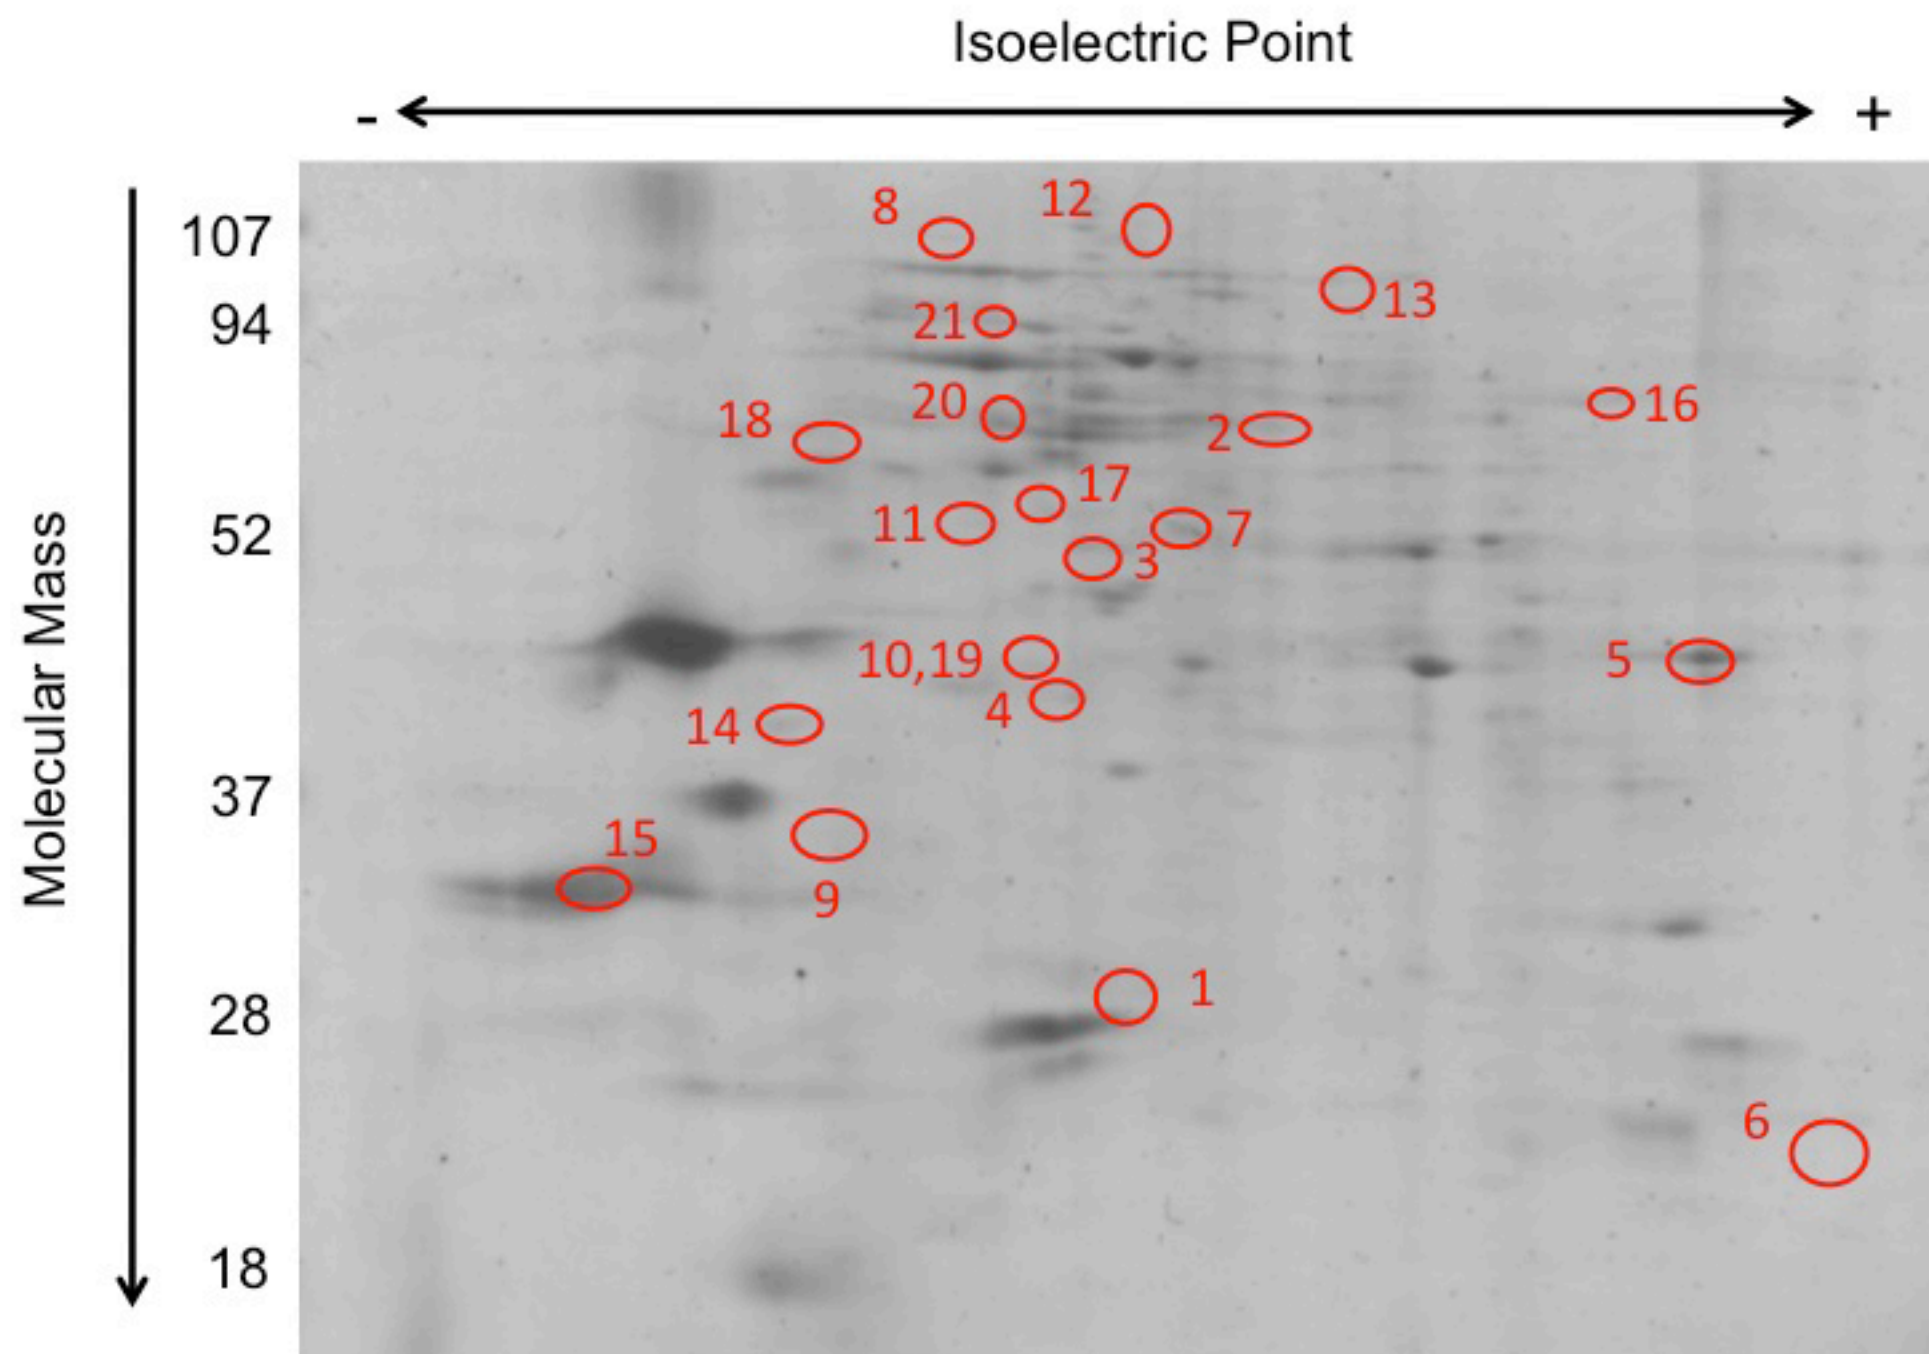

Figure S3. Panel C

Supplement: supp_M113.034322_mcp.M113.034322-5.pdf [file supp_M113.034322_mcp.M113.034322-5.pdf]

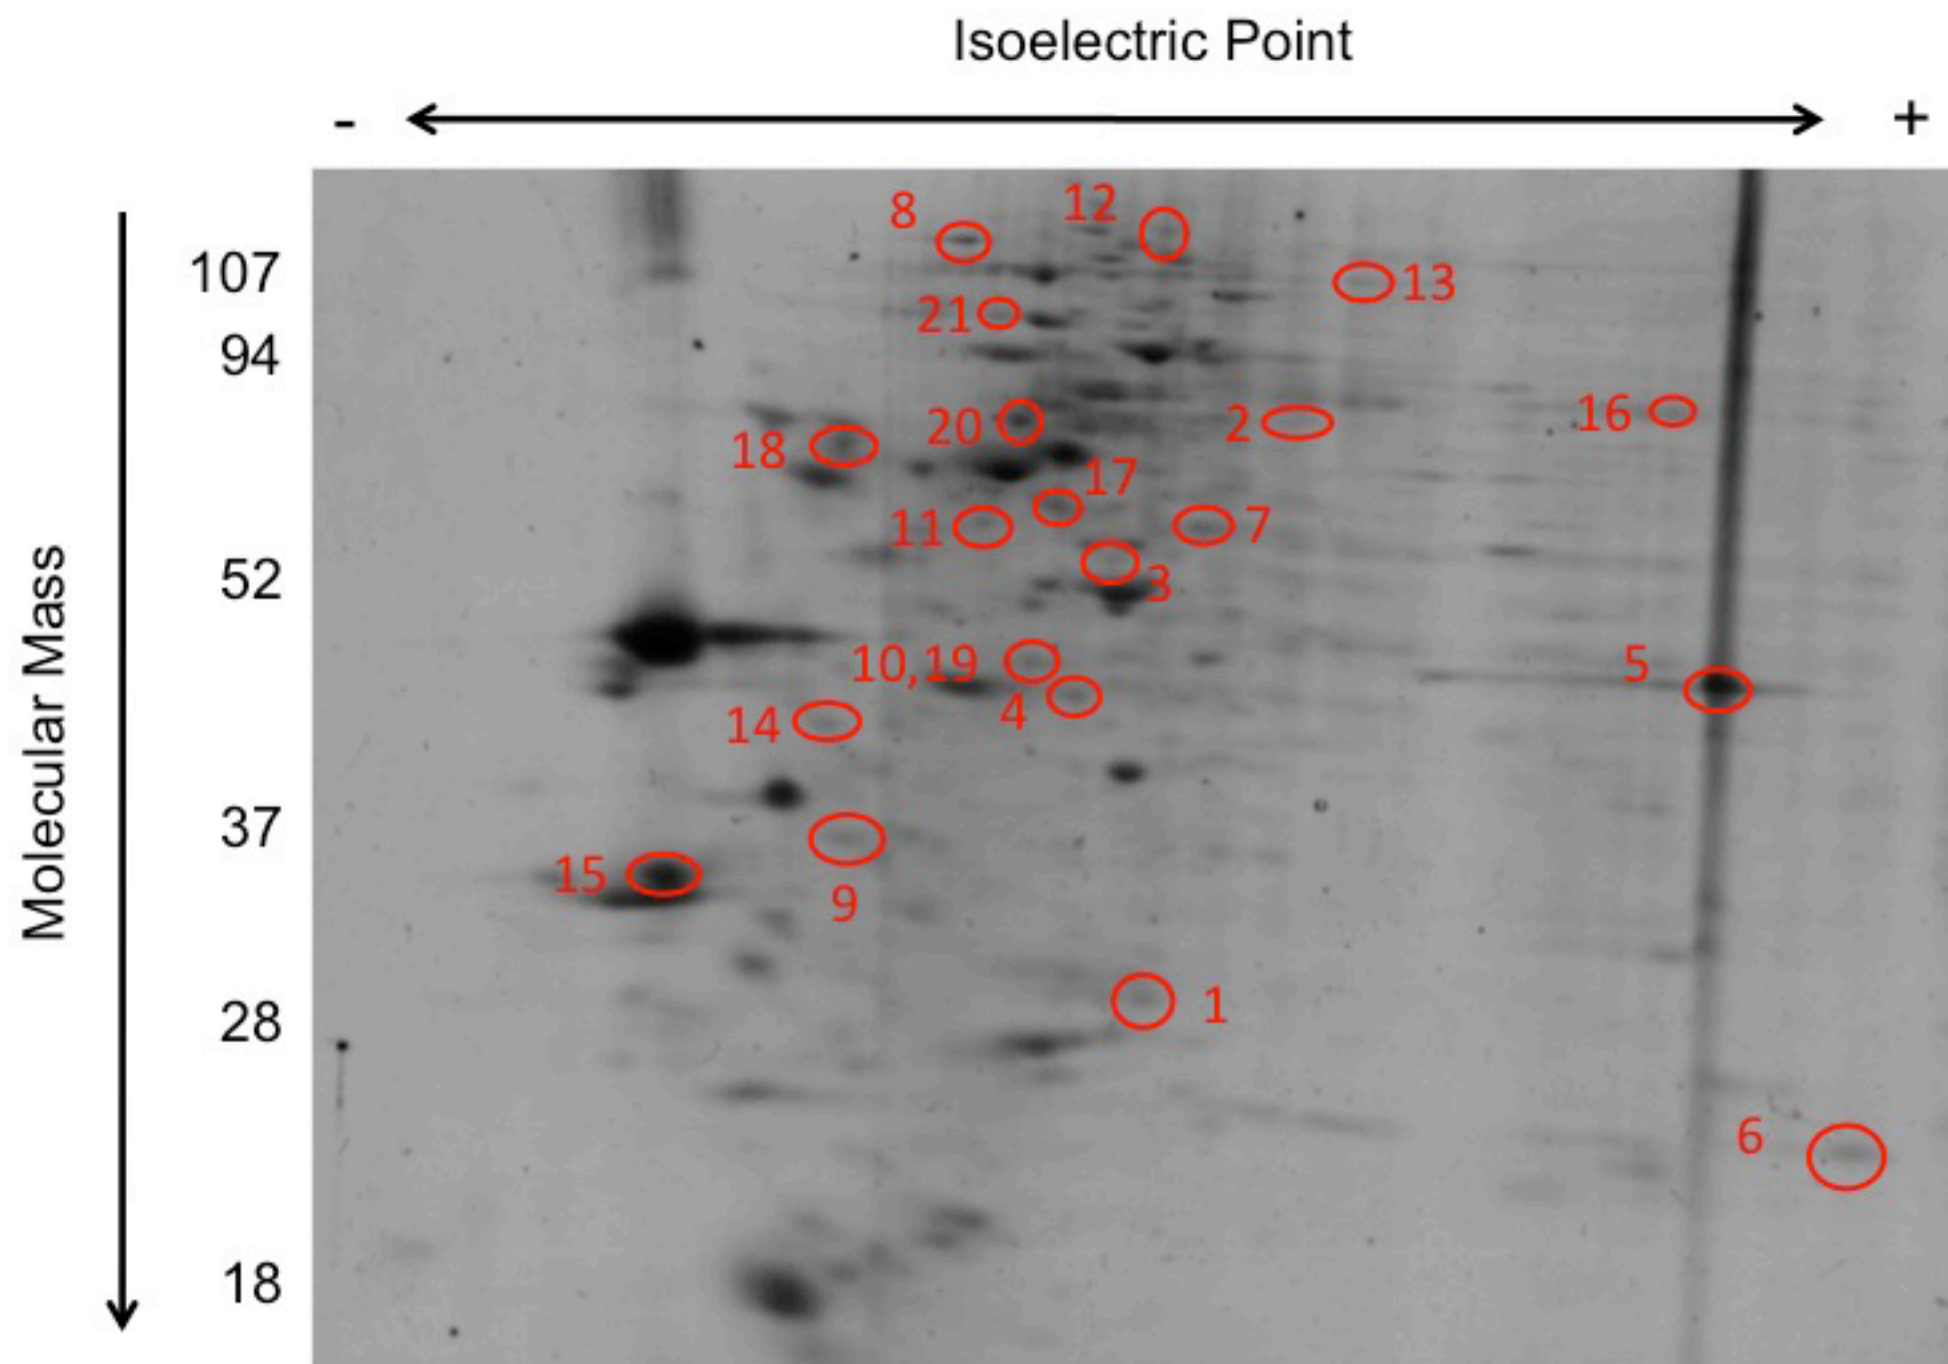

Figure S3. Panel D

Supplement: supp_M113.034322_mcp.M113.034322-6.pdf [file supp_M113.034322_mcp.M113.034322-6.pdf]

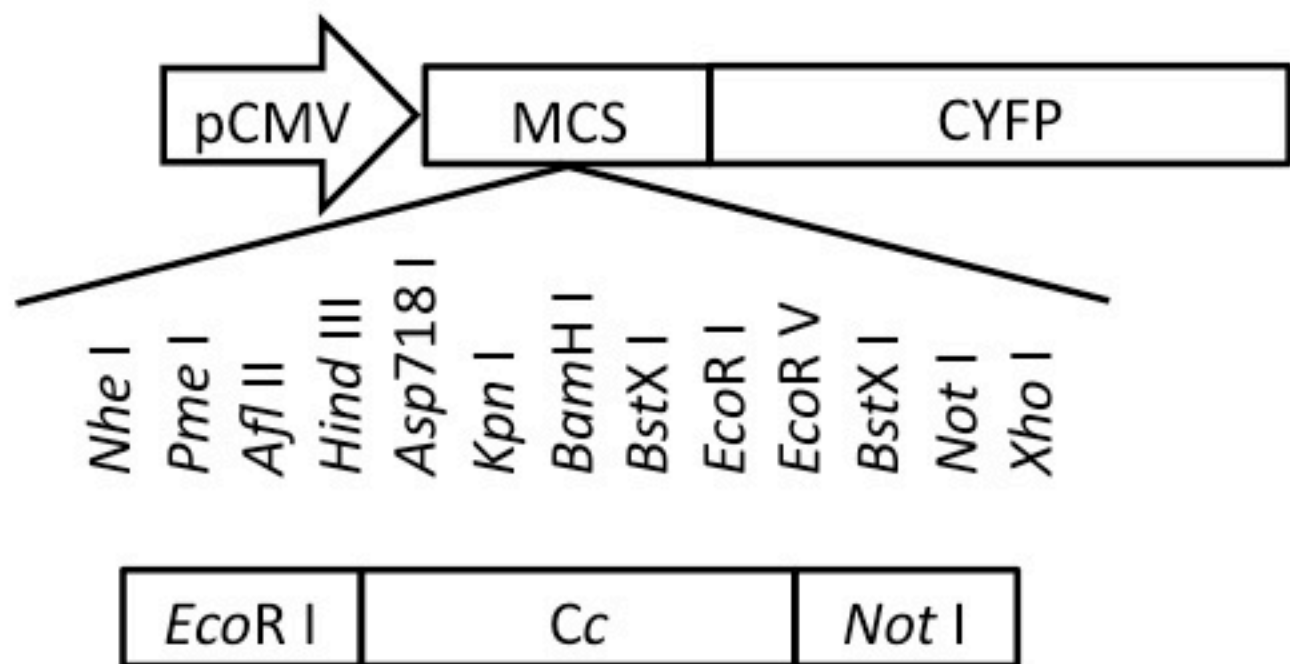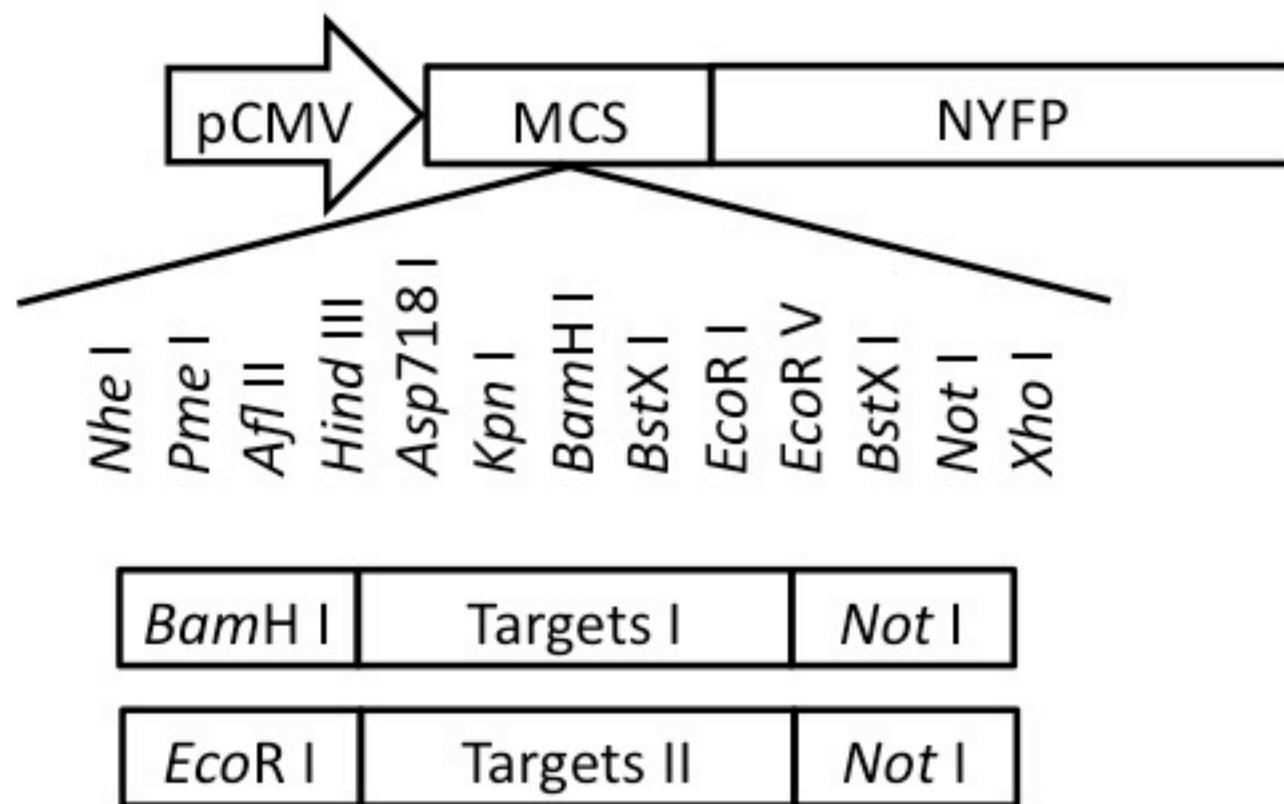

Figure S4

Supplement: supp_M113.034322_mcp.M113.034322-7.pdf [file supp_M113.034322_mcp.M113.034322-7.pdf]

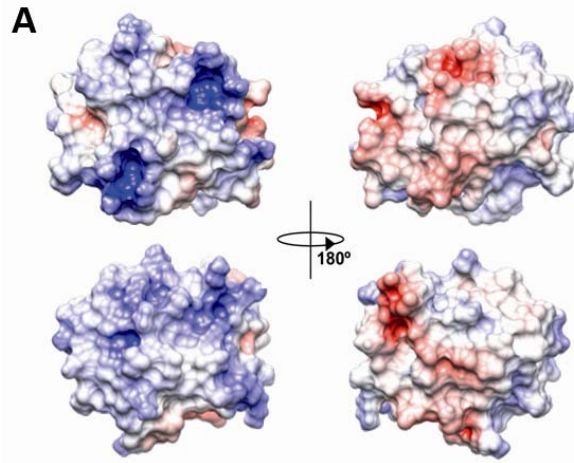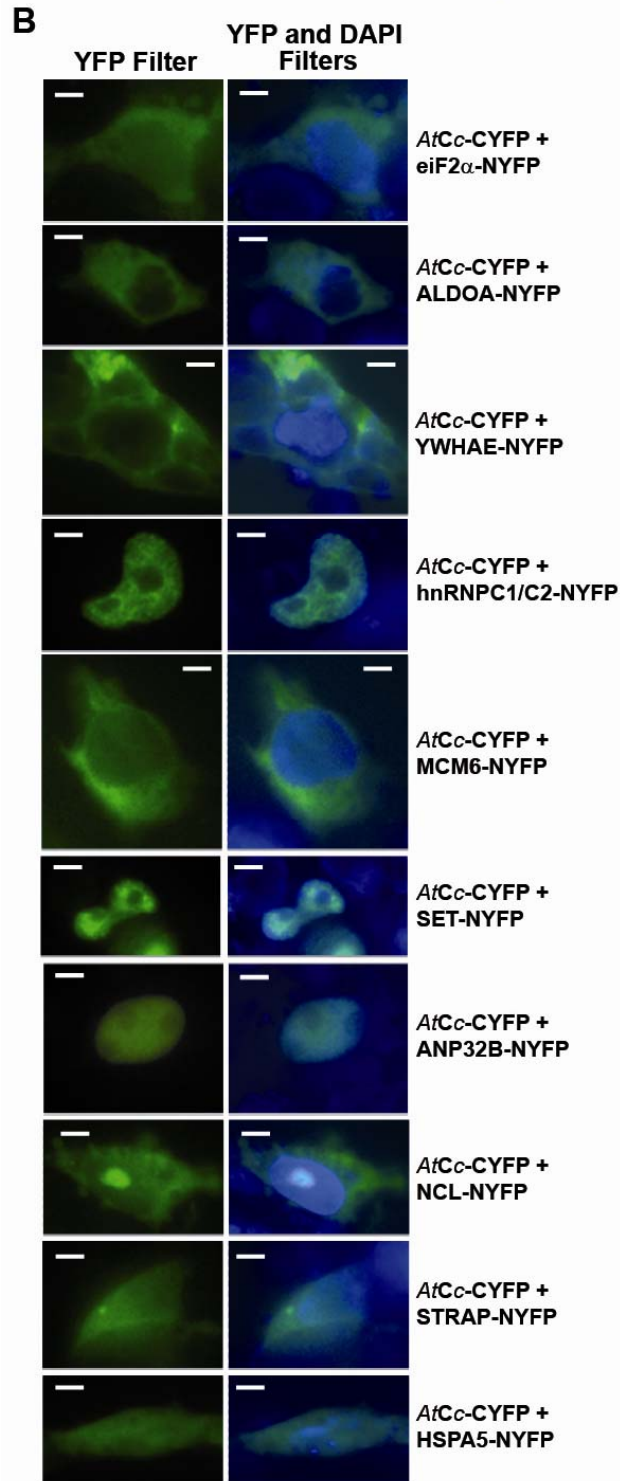

**Figure S5**

Supplement: supp_M113.034322_mcp.M113.034322-8.pdf [file supp_M113.034322_mcp.M113.034322-8.pdf]
